# Supplementary material
Source: PubMed Central journal article supplement (PMC9712537)

## **A *Shigella sonnei* clone with extensive drug resistance associated with waterborne outbreaks in China**

### **Supplementary Figures**

- Figure S1. S1–PFGE and Southern blotting analysis of the *mcr-1*-, *bla*<sub>CTX-M-14</sub>, and *mphA*-positive plasmids
- Figure S2. Annual precipitation and flood-affected areas in Guangxi and Anhui Provinces from 2011 to 2020
- Figure S3. Box plot representing the antimicrobial resistance gene content among different groups
- Figure S4. Distribution, related resistance genes, and structures of integrons
- Figure S5. Distribution of virulence-encoding genes with different functions
- Figure S6. Pangenome analysis of global *S. sonnei* isolates
- Figure S7. Temporal distribution of cases from the outbreaks

### **Supplementary Tables**

- Table S1. Characteristics of the patients from the six outbreaks
- Table S2. Antimicrobial resistance of the Chinese *S. sonnei* isolates including the outbreak strains
- Table S3. The genome-sequenced *S. sonnei* isolates used in this study (a separate EXCEL file)
- Table S4. The plasmids identified in this study

- Table S5. The SNPs detected associated with  $\text{cef}^{\text{R}}\text{azi}^{\text{R}}$  isolates especially the outbreak strains
- Table S6. The SNPs associated with virulence-encoding genes
- Table S7. The accessory genes identified associated with  $\text{cef}^{\text{R}}\text{azi}^{\text{R}}$  isolates, especially the outbreak strains
- Table S8. The primers used in this study

## Supplementary Figures

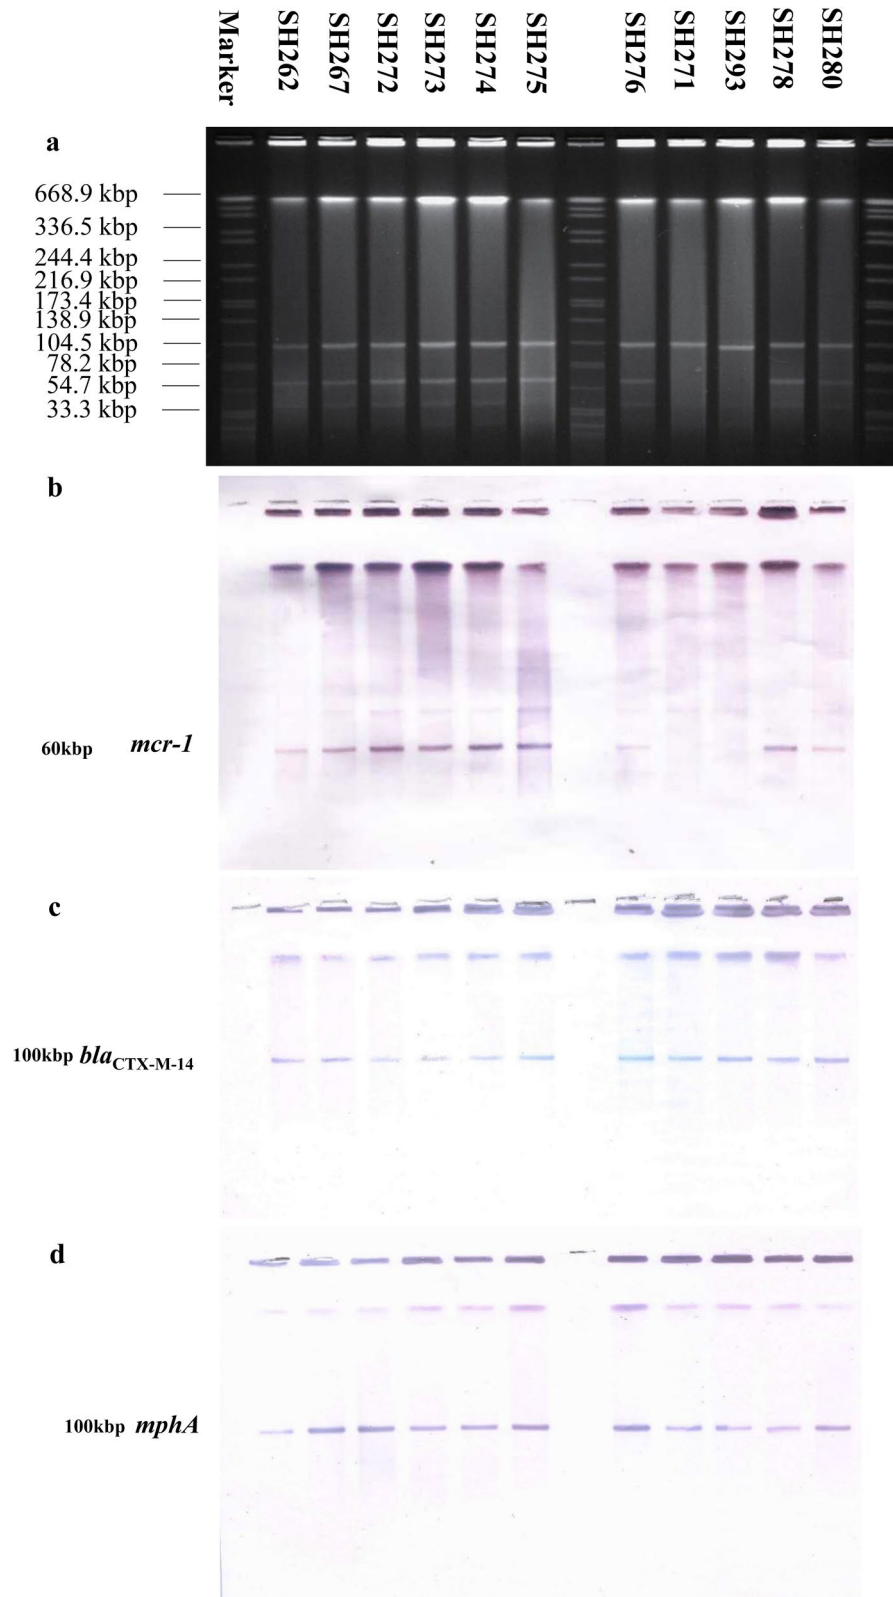

**Figure S1. S1-PFGE and Southern blotting analysis of the *mcr-1*-, *bla*<sub>CTX-M-14</sub>, and *mphA*-positive plasmids.** Eleven representative isolates, including ten from patients and one from tap water, were selected for S1-PFGE and Southern hybridization analysis. The universal standard strain *Salmonella braenderup* H9812 digested with XbaI was used as the size marker for the PFGE and southern. The size of the Nylon membrane was the same as the PFGE. All experiments were independently repeated twice. **a** S1 nuclease plasmid profile obtained by PFGE. **b** Southern hybridization for the *mcr-1* gene. **c** Southern hybridization for the *bla*<sub>CTX-M-14</sub> gene. **d** Southern hybridization for the *mphA* gene. Source data are provided as a Source Data file and are provided at the end of this file. S1-PFGE S1 nuclease pulsed-field gel electrophoresis.

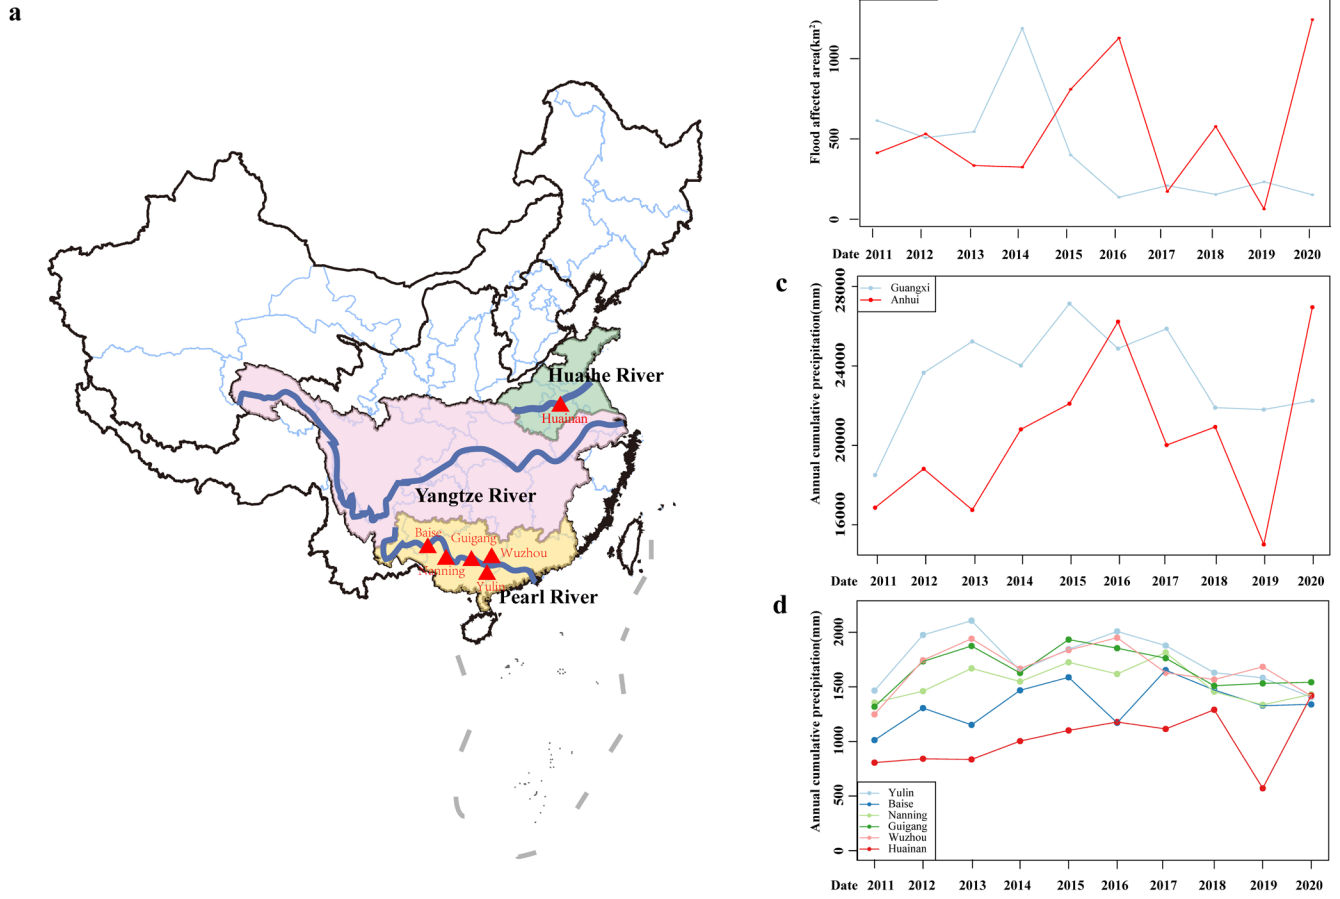

**Figure S2. Annual precipitation and flood-affected areas in Guangxi and Anhui Provinces from 2011 to 2020.** **a** shows the outbreak locations and the major rivers flowing through the regions. **b** shows the flood-affected areas in Anhui and Guangxi Provinces of China from 2011 to 2020. **c** shows the annual cumulative precipitation in Anhui and Guangxi Provinces of China from 2011 to 2020. **d** shows the annual cumulative precipitation in six outbreak locations from 2011 to 2020. The map was created using publicly available data (<https://www.webmap.cn/main.do?method=index>). Source data are provided as a Source Data file.

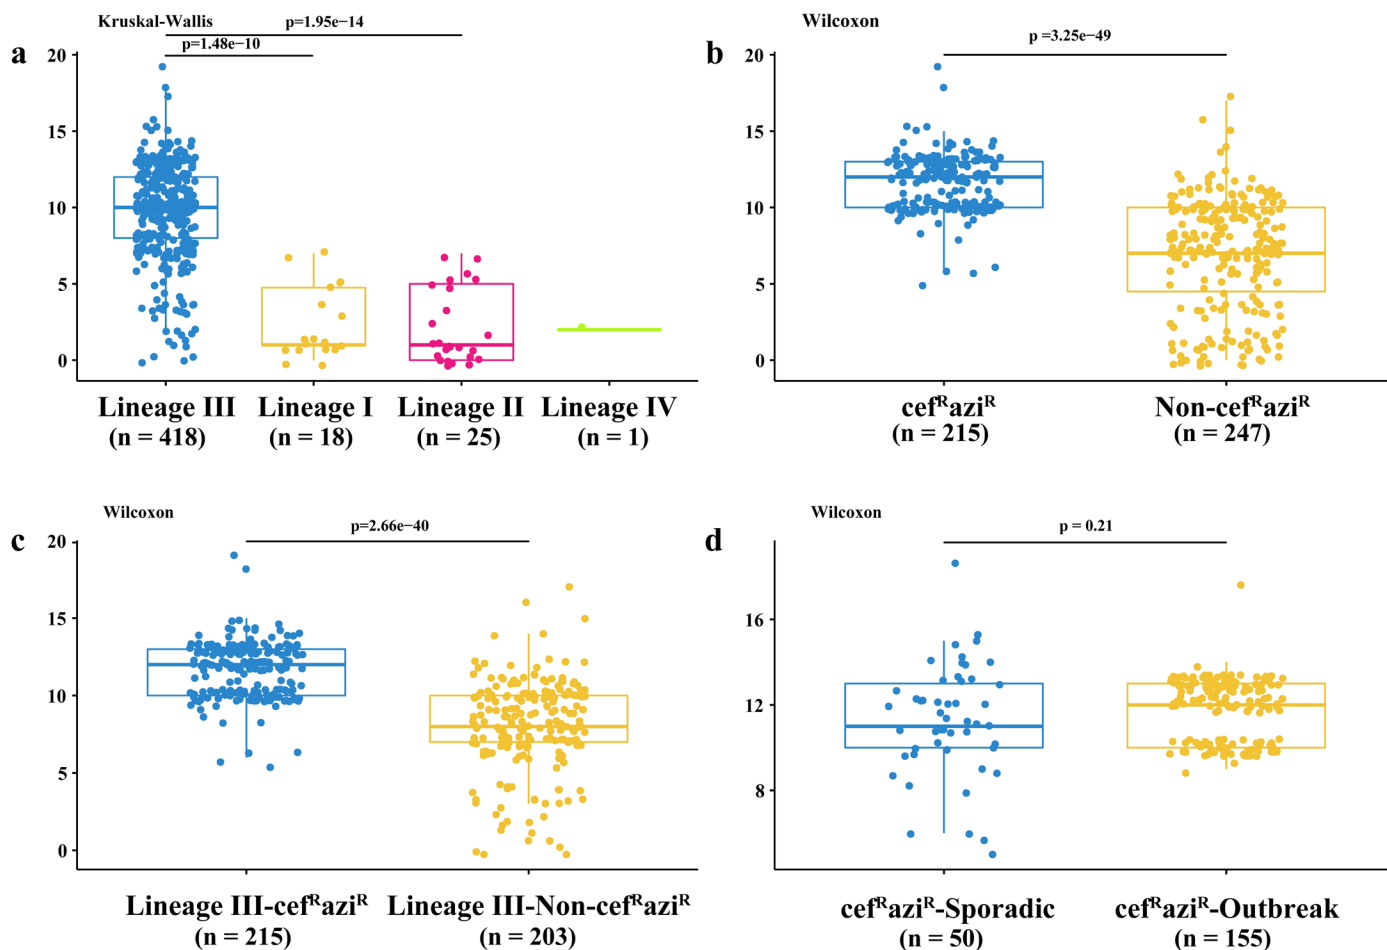

**Figure S3. Box plot representing the antimicrobial resistance gene content among different groups.** **a** shows that lineage III strains carry more AMR genes than other lineages. **b** and **c** show that the cef<sup>R</sup>azi<sup>R</sup> strains carry more AMR genes than non-cef<sup>R</sup>azi<sup>R</sup> strains as a whole or in lineage III. **d** indicates that the gene number shows no significant difference in the outbreak cef<sup>R</sup>azi<sup>R</sup> and sporadic cef<sup>R</sup>azi<sup>R</sup> strains. Centerline, median; box limits, upper and lower quartiles; whiskers, 1.5x interquartile range; points, individual data. All statistical tests were two-sided. Source data are provided as a Source Data file. cef<sup>R</sup>azi<sup>R</sup> coresistance to ceftriaxone and azithromycin, AMR antimicrobial resistance.

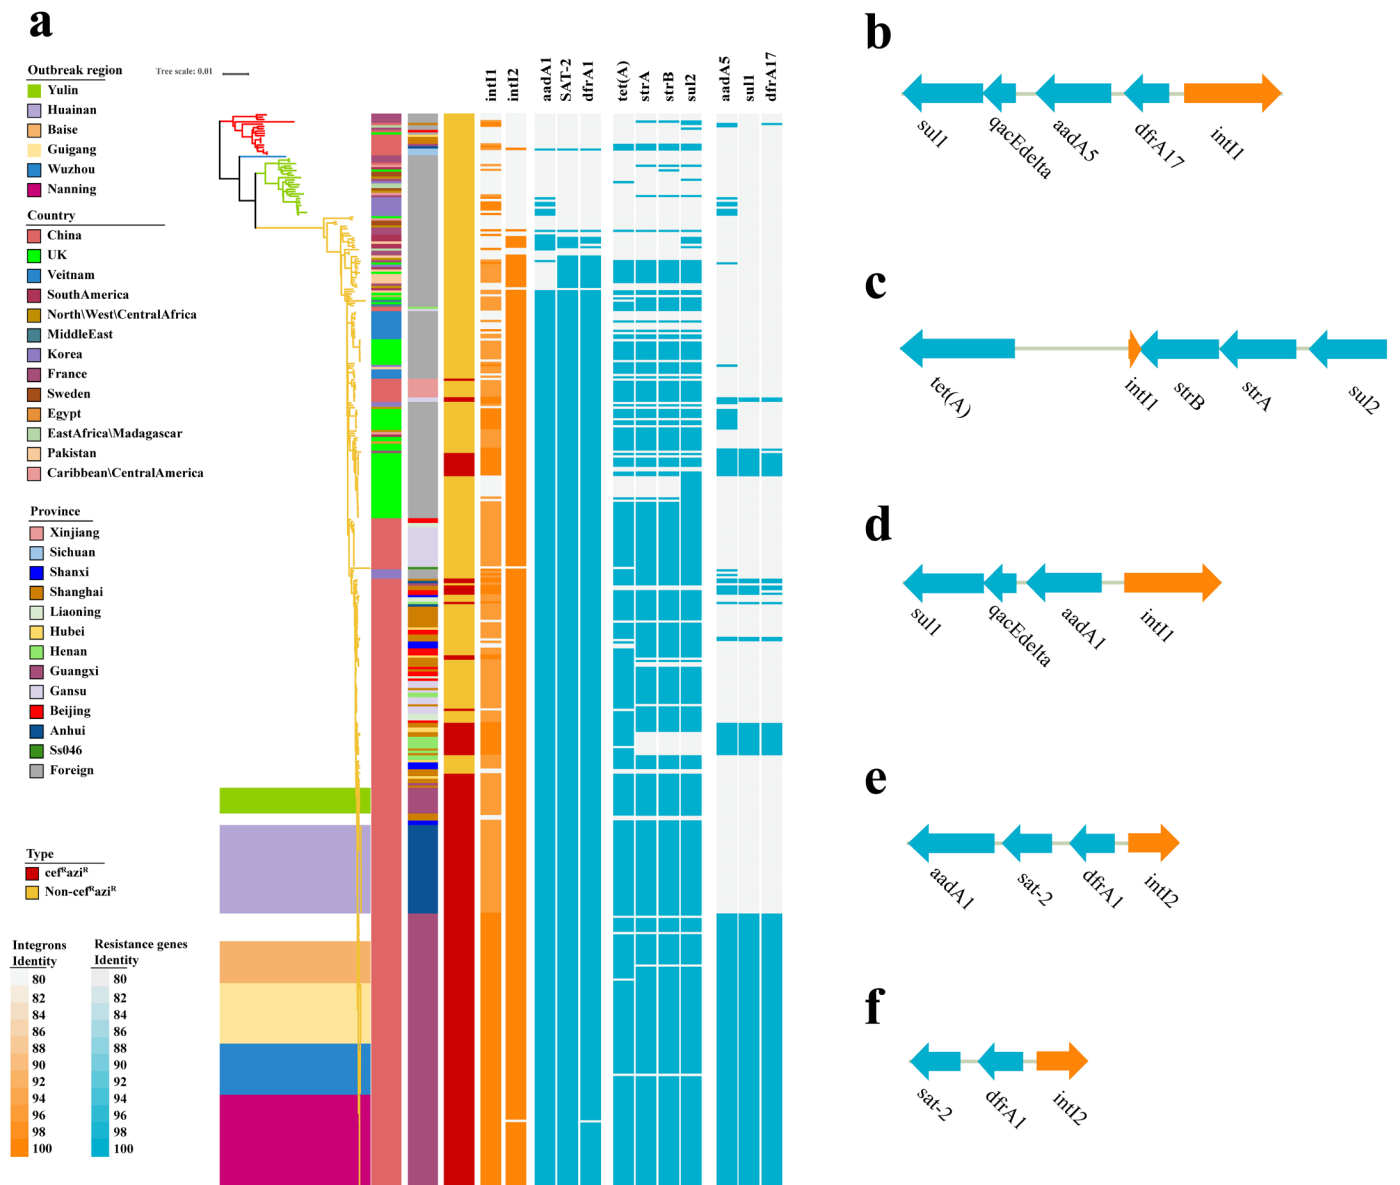

**Figure S4. Distribution, related resistance genes, and structures of integrons.** **a** shows 10 resistance genes associated with integrons. **b** to **f** show the structures of the five integrons. Source data are provided as a Source Data file. cef<sup>R</sup>azi<sup>R</sup> coreistance to ceftriaxone and azithromycin.

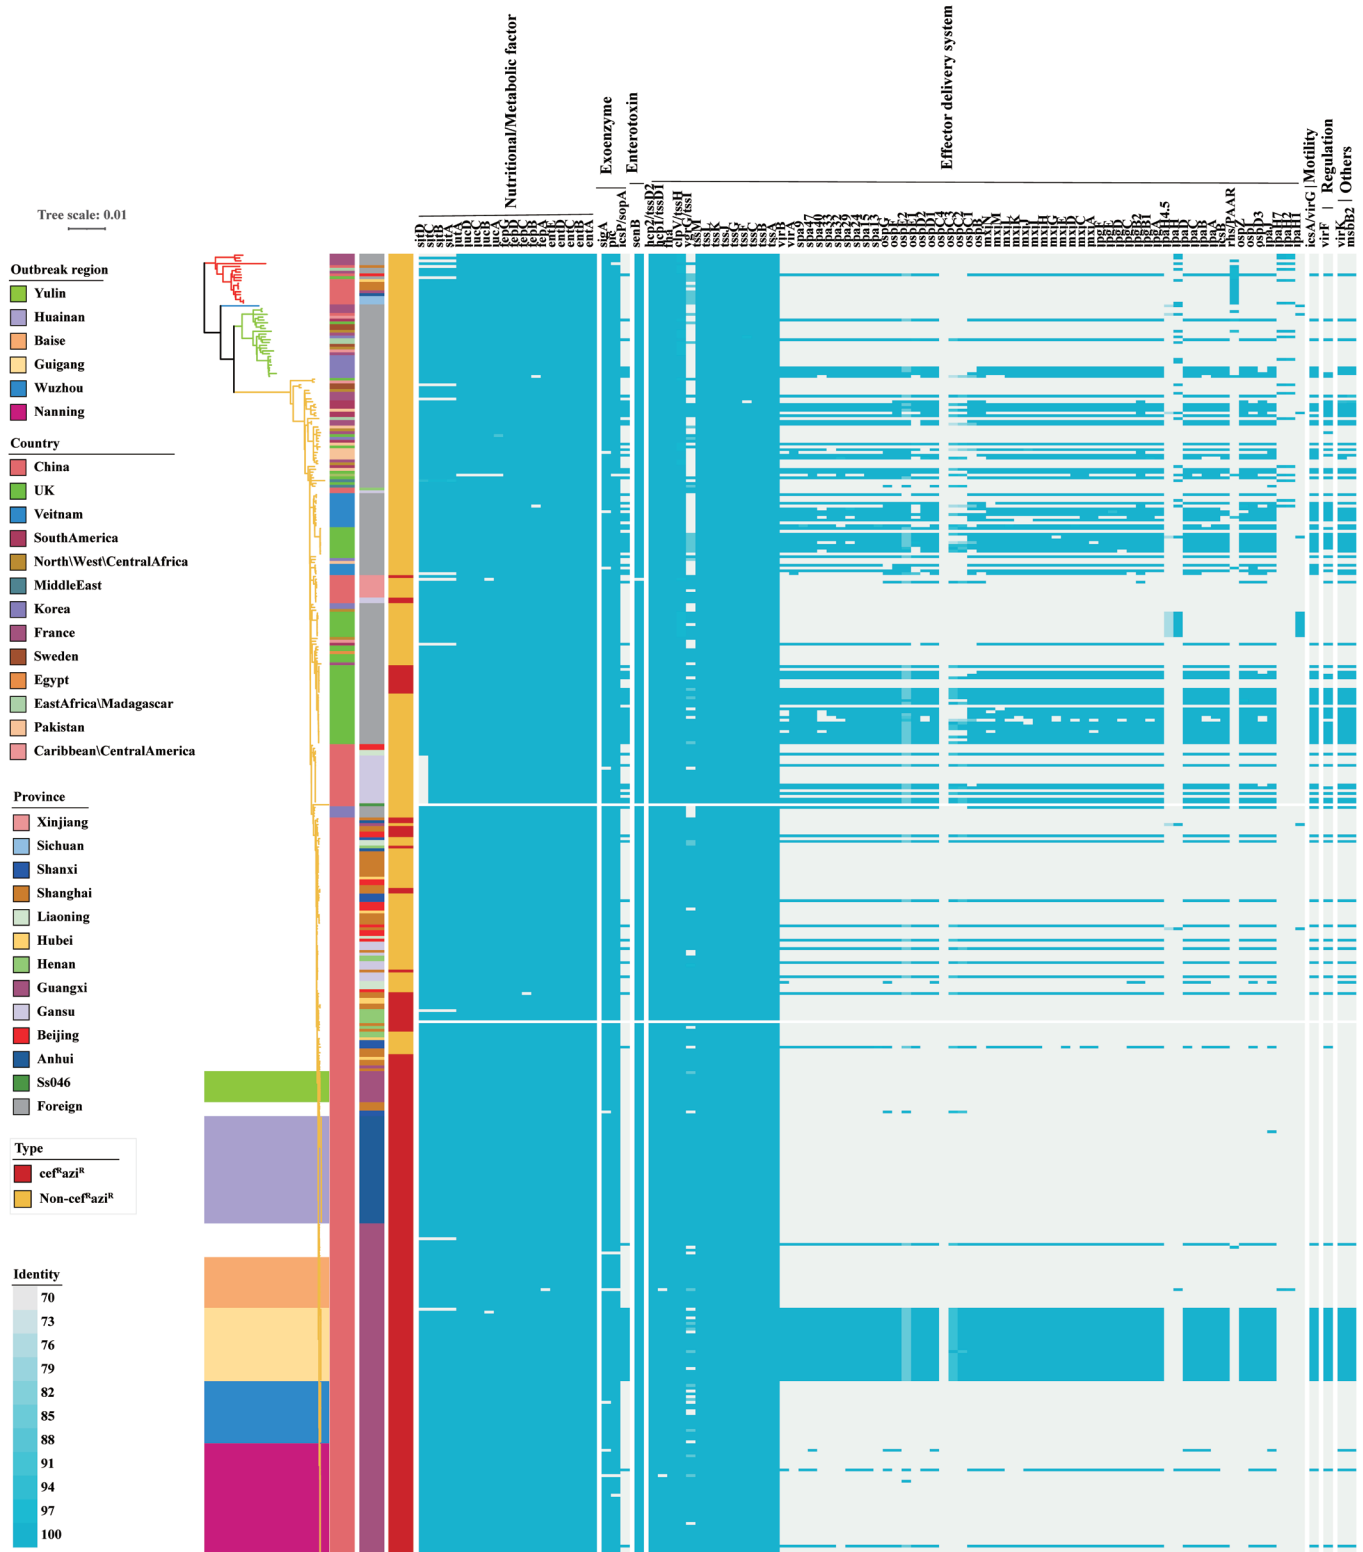

**Figure S5. Distribution of virulence-encoding genes with different functions.** The exoenzyme, effector delivery system, motility, regulation, and two other function genes were absent in most of the strains. There were no significant associations between the genes and the cef<sup>R</sup>azi<sup>R</sup> strains. Source data are provided as a Source Data file. cef<sup>R</sup>azi<sup>R</sup> coresistance to ceftriaxone and azithromycin.

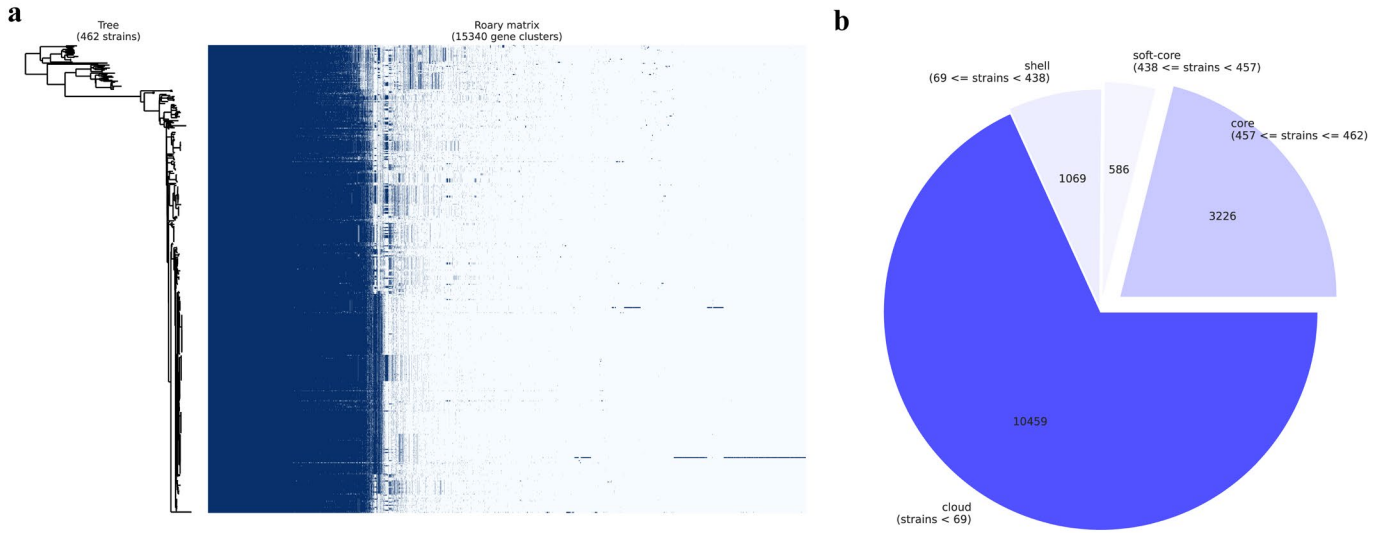

**Figure S6. Pangenome analysis of global *S. sonnei* isolates.** A total of 15,340 genes were identified by pangenome analysis based on the 462 isolates, 12,114 of which were assigned to the accessory genome. **a** shows a heatmap displaying the distribution of the pangenome among isolates. Dark blue indicates the presence of a gene, and light blue indicates the absence of a gene. **b** shows the proportion of core and accessory genes. Source data are provided as a Source Data file.



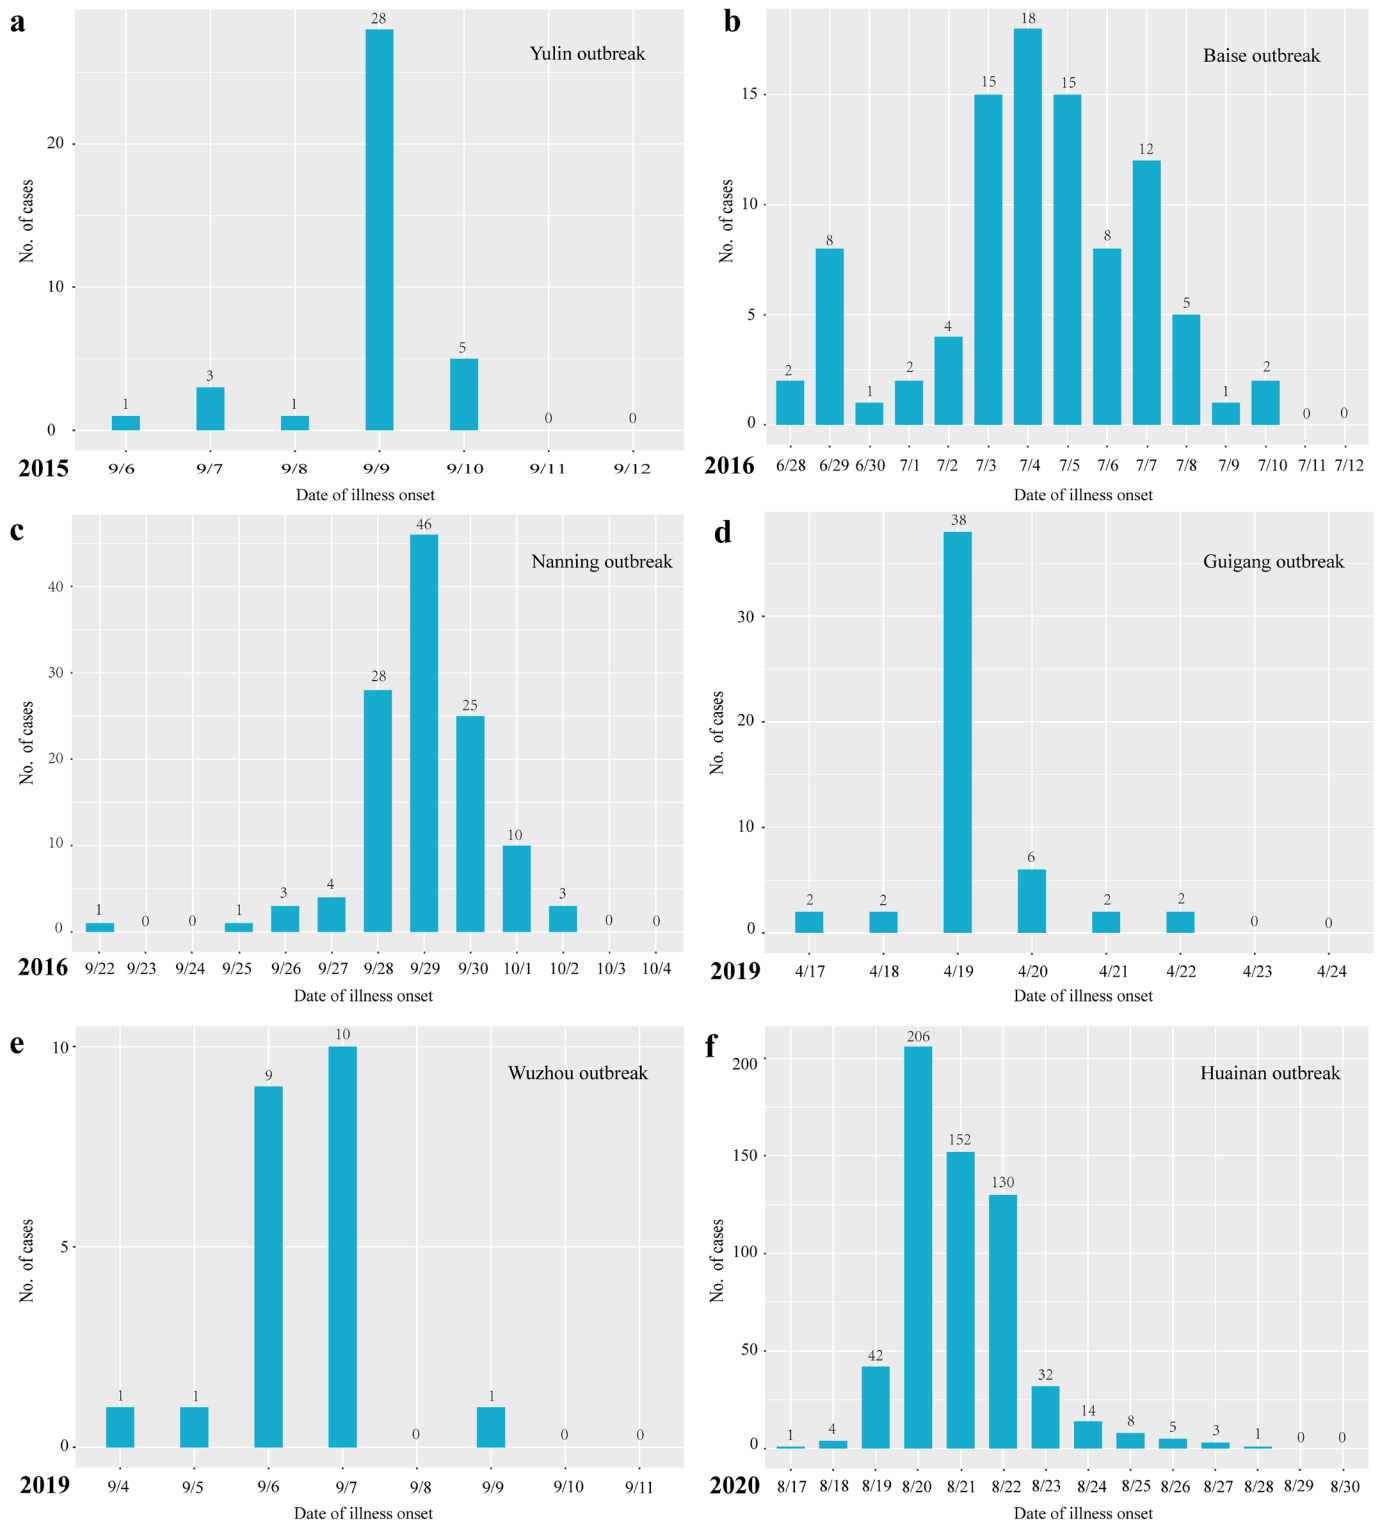

**Figure S7. Temporal distribution of cases from the outbreaks.** a to f show the temporal distribution of the cases from the six outbreaks, respectively. Source data are provided as a Source Data file.

## Supplementary Tables

**Table S1. Characteristics of the patients from the six outbreaks**

| Characteristics            | Yulin Outbreak (N = 38) | Baise Outbreak (N = 93) | Nanning Outbreak (N = 121) | Guigang Outbreak (N = 52) | Wuzhou Outbreak (N = 22) | Huainan Outbreak (n = 107)      | Total (N = 433)            |
|----------------------------|-------------------------|-------------------------|----------------------------|---------------------------|--------------------------|---------------------------------|----------------------------|
| Geographical latitude      | Southern China          | Southern China          | Southern China             | Southern China            | Southern China           | Eastern China                   | Southern and Eastern China |
| Province                   | Guangxi                 | Guangxi                 | Guangxi                    | Guangxi                   | Guangxi                  | Anhui                           | Guangxi and Anhui          |
| Outbreak location          | Town                    | Town                    | Town                       | Village                   | Town                     | Town                            | Village and towns          |
| Outbreak unit              | Kindergarten            | Primary school          | Middle school              | Kindergarten              | Middle school            | Kindergarten and Primary school | Kindergartens and schools  |
| Year                       | 2015                    | 2016                    | 2016                       | 2019                      | 2019                     | 2020                            | 2015-2020                  |
| Occupation, no. (%)        |                         |                         |                            |                           |                          |                                 |                            |
| Preschool children         | 38 (100)                | 35 (37.6)               | 0                          | 52 (100)                  | 0                        | 25 (23.4)                       | 150 (34.6)                 |
| Primary school student     | 0                       | 51 (54.8)               | 0                          | 0                         | 2 (9.1)                  | 59 (55.1)                       | 112 (25.9)                 |
| Junior high school student | 0                       | 0                       | 119 (98.3)                 | 0                         | 19 (86.4)                | 0                               | 138 (31.9)                 |
| Teaching staff             | 0                       | 2 (2.2)                 | 2 (1.7)                    | 0                         | 1 (4.5)                  | 0                               | 5 (1.2)                    |
| Farmer                     | 0                       | 5 (5.4)                 | 0                          | 0                         | 0                        | 23 (21.5)                       | 28 (6.5)                   |
| Age, no. (%)               |                         |                         |                            |                           |                          |                                 |                            |
| ≤ 3 yr                     | 12 (31.6)               | 16 (17.2)               | 0                          | 6 (11.5)                  | 0                        | 0                               | 34 (7.9)                   |
| 4-6 yr                     | 26 (68.4)               | 19 (20.4)               | 0                          | 46 (88.5)                 | 0                        | 25 (23.4)                       | 116 (26.8)                 |
| 7-14 yr                    | 0                       | 51 (54.8)               | 119 (98.3)                 | 0                         | 21 (95.5)                | 59 (55.1)                       | 250 (57.7)                 |
| > 14 yr                    | 0                       | 7 (7.5)                 | 2 (1.7)                    | 0                         | 1 (4.5)                  | 23 (21.5)                       | 33 (7.6)                   |

|                   |           |           |            |           |           |            |            |
|-------------------|-----------|-----------|------------|-----------|-----------|------------|------------|
| Male sex, no. (%) | 23 (61)   | 40 (43)   | 45 (37)    | 33 (63)   | 14 (64)   | 54 (50)    | 209 (48.3) |
| Symptoms, no. (%) |           |           |            |           |           |            |            |
| Diarrhea          | 38 (100)  | 93 (100)  | 121 (100)  | 52 (100)  | 22 (100)  | 107 (100)  | 433 (100)  |
| Fever             | 37 (97.4) | 89 (95.7) | 113 (93.4) | 47 (90.4) | 20 (90.9) | 101 (94.4) | 407 (94.0) |
| Abdominal pain    | 30 (57.7) | 55 (59.1) | 84 (69.4)  | 52 (100)  | 16 (72.7) | 67 (62.6)  | 304 (70.2) |
| Vomiting          | 27 (71.1) | 72 (77.4) | 82 (67.8)  | 29 (55.8) | 11 (50.0) | 72 (67.3)  | 293 (67.7) |
| Rectal Tenesmus   | 26 (68.4) | 60 (64.5) | 62 (51.2)  | 35 (67.3) | 35 (67.3) | 0          | 218 (50.3) |
| Nausea            | 10 (26.3) | 25 (26.9) | 34 (28.1)  | 1 (1.9)   | 3 (13.6)  | 23 (21.5)  | 96 (22.2)  |
| Dizziness         | 0         | 3 (3.2)   | 0          | 1 (1.9)   | 0         | 3 (2.8)    | 7 (1.6)    |

**Table S2. Antimicrobial resistance of the Chinese *S. sonnei* isolates including the outbreak strains**

| Antimicrobials                | Antimicrobial resistance (%)  |                               |                                 |                                 |                                |                                 |                    |                       |                  |
|-------------------------------|-------------------------------|-------------------------------|---------------------------------|---------------------------------|--------------------------------|---------------------------------|--------------------|-----------------------|------------------|
|                               | Outbreak                      |                               |                                 |                                 |                                |                                 |                    | Sporadic<br>(n = 152) | All (n =<br>307) |
|                               | Yulin<br>outbreak<br>(n = 11) | Baise<br>outbreak<br>(n = 18) | Nanning<br>outbreak<br>(n = 40) | Guigang<br>outbreak<br>(n = 26) | Wuzhou<br>outbreak (n<br>= 22) | Huainan<br>outbreak<br>(n = 38) | Total (n =<br>155) |                       |                  |
| Ceftazidime                   | 0.0                           | 0.0                           | 0.0                             | 0.0                             | 0.0                            | 0.0                             | 0.0                | 2.6                   | 1.3              |
| Ceftriaxone                   | 100.0                         | 100.0                         | 100.0                           | 100.0                           | 100.0                          | 100.0                           | 100.0              | 82.2                  | 91.2             |
| Imipenem                      | 0.0                           | 0.0                           | 0.0                             | 0.0                             | 0.0                            | 0.0                             | 0.0                | 0.0                   | 0.0              |
| Nitrofurantoin                | 0.0                           | 0.0                           | 0.0                             | 0.0                             | 0.0                            | 0.0                             | 0.0                | 0.7                   | 0.3              |
| Piperacillin                  | 100.0                         | 77.8                          | 100.0                           | 100.0                           | 100.0                          | 100.0                           | 97.4               | 70.4                  | 84.0             |
| Tetracycline                  | 100.0                         | 100.0                         | 100.0                           | 100.0                           | 100.0                          | 100.0                           | 100.0              | 84.9                  | 92.5             |
| Cefepime                      | 0.0                           | 0.0                           | 0.0                             | 0.0                             | 0.0                            | 0.0                             | 0.0                | 0.0                   | 0.0              |
| Cefoperazone                  | 100.0                         | 100.0                         | 100.0                           | 100.0                           | 100.0                          | 100.0                           | 100.0              | 67.1                  | 83.7             |
| Cefazolin                     | 100.0                         | 100.0                         | 100.0                           | 100.0                           | 100.0                          | 100.0                           | 100.0              | 82.2                  | 91.2             |
| Cefoxitin                     | 0.0                           | 0.0                           | 5.0                             | 0.0                             | 0.0                            | 0.0                             | 1.3                | 5.3                   | 3.3              |
| Tobramycin                    | 100.0                         | 83.3                          | 87.5                            | 100.0                           | 100.0                          | 100.0                           | 94.8               | 31.6                  | 63.5             |
| Levofloxacin                  | 0.0                           | 0.0                           | 0.0                             | 0.0                             | 0.0                            | 0.0                             | 0.0                | 0.0                   | 0.0              |
| Gentamicin                    | 100.0                         | 100.0                         | 100.0                           | 100.0                           | 100.0                          | 100.0                           | 100.0              | 62.5                  | 81.4             |
| Ticarcillin                   | 100.0                         | 100.0                         | 100.0                           | 100.0                           | 100.0                          | 100.0                           | 100.0              | 84.9                  | 92.5             |
| Ticarcillin/clavulanic acid   | 0.0                           | 0.0                           | 5.0                             | 0.0                             | 0.0                            | 0.0                             | 1.3                | 14.5                  | 7.8              |
| Aztreonam                     | 0.0                           | 0.0                           | 2.5                             | 3.8                             | 0.0                            | 0.0                             | 1.3                | 15.8                  | 8.5              |
| Ampicillin                    | 100.0                         | 100.0                         | 100.0                           | 100.0                           | 100.0                          | 100.0                           | 100.0              | 84.2                  | 92.2             |
| Chloramphenicol               | 0.0                           | 0.0                           | 0.0                             | 0.0                             | 0.0                            | 0.0                             | 0.0                | 3.3                   | 1.6              |
| Trimethoprim/sulfamethoxazole | 100.0                         | 100.0                         | 100.0                           | 100.0                           | 100.0                          | 100.0                           | 100.0              | 86.8                  | 93.5             |

|                                                    |       |       |       |       |       |       |       |      |      |
|----------------------------------------------------|-------|-------|-------|-------|-------|-------|-------|------|------|
| Norfloxacin                                        | 0.0   | 0.0   | 0.0   | 0.0   | 0.0   | 0.0   | 0.0   | 0.0  | 0.0  |
| Amikacin                                           | 0.0   | 0.0   | 0.0   | 0.0   | 0.0   | 0.0   | 0.0   | 0.0  | 0.0  |
| Azithromycin                                       | 100.0 | 100.0 | 100.0 | 100.0 | 100.0 | 100.0 | 100.0 | 32.9 | 66.8 |
| Colistin                                           | 0.0   | 0.0   | 75.0  | 0.0   | 0.0   | 0.0   | 19.4  | 2.0  | 10.7 |
| cef <sup>R</sup> azi <sup>R</sup>                  | 100.0 | 100.0 | 100.0 | 100.0 | 100.0 | 100.0 | 100.0 | 32.9 | 66.8 |
| cef <sup>R</sup> azi <sup>R</sup> col <sup>R</sup> | 0.0   | 0.0   | 75.0  | 0.0   | 0.0   | 0.0   | 19.4  | 0.0  | 9.8  |

**Table S3. The genome-sequenced *S. sonnei* isolates used in this study.** Due to the page size limitation, Supplementary Table S3 is provided as a separate EXCEL file.

**Table S4. The plasmids identified in this study**

| <b>Plasmid</b> | <b>GenBank no.</b> | <b>Replicon type</b> | <b>Size of plasmid (bp)</b> | <b>Resistance gene</b> | <b>Isolate</b> | <b>Region</b>    | <b>Year</b> |
|----------------|--------------------|----------------------|-----------------------------|------------------------|----------------|------------------|-------------|
| pSH262-1       | MG299127           | IncI2                | 63066                       | mcr-1                  | SH262          | Guangxi Province | 2016        |
| pSH267-1       | MG299129           | IncI2                | 63066                       | mcr-1                  | SH267          | Guangxi Province | 2016        |
| pSH272-1       | MG299132           | IncI2                | 62958                       | mcr-1                  | SH272          | Guangxi Province | 2016        |
| pSH273-1       | MG299134           | IncI2                | 63066                       | mcr-1                  | SH273          | Guangxi Province | 2016        |
| pSH274-1       | MG299136           | IncI2                | 63066                       | mcr-1                  | SH274          | Guangxi Province | 2016        |
| pSH275-1       | MG299138           | IncI2                | 63066                       | mcr-1                  | SH275          | Guangxi Province | 2016        |
| pSH276-1       | MG299140           | IncI2                | 62958                       | mcr-1                  | SH276          | Guangxi Province | 2016        |
| pSH278-1       | MG299142           | IncI2                | 63066                       | mcr-1                  | SH278          | Guangxi Province | 2016        |
| pSH280-1       | MG299144           | IncI2                | 63066                       | mcr-1                  | SH280          | Guangxi Province | 2016        |
| pSH284-1       | MG299146           | IncI2                | 63066                       | mcr-1                  | SH284          | Guangxi Province | 2016        |
| pSH286-1       | MG299148           | IncI2                | 62958                       | mcr-1                  | SH286          | Guangxi Province | 2016        |

|          |          |            |        |                                                   |       |                  |      |
|----------|----------|------------|--------|---------------------------------------------------|-------|------------------|------|
| pSH287-1 | MG299150 | IncI2      | 62958  | mcr-1                                             | SH287 | Guangxi Province | 2016 |
| pSH292-1 | MG299152 | IncI2      | 62958  | mcr-1                                             | SH292 | Guangxi Province | 2016 |
| pSH262-2 | MG299128 | IncB/O/K/Z | 109845 | blaCTX-M-14/mphA/aac(3)-<br>IId/aadA5/dfrA17/sul1 | SH262 | Guangxi Province | 2016 |
| pSH267-2 | MG299130 | IncB/O/K/Z | 109845 | blaCTX-M-14/mphA/aac(3)-<br>IId/aadA5/dfrA17/sul1 | SH267 | Guangxi Province | 2016 |
| pSH271-2 | MG299131 | IncB/O/K/Z | 109845 | blaCTX-M-14/mphA/aac(3)-<br>IId/aadA5/dfrA17/sul1 | SH271 | Guangxi Province | 2016 |
| pSH272-2 | MG299133 | IncB/O/K/Z | 109845 | blaCTX-M-14/mphA/aac(3)-<br>IId/aadA5/dfrA17/sul1 | SH272 | Guangxi Province | 2016 |
| pSH273-2 | MG299135 | IncB/O/K/Z | 109845 | blaCTX-M-14/mphA/aac(3)-<br>IId/aadA5/dfrA17/sul1 | SH273 | Guangxi Province | 2016 |
| pSH274-2 | MG299137 | IncB/O/K/Z | 109845 | blaCTX-M-14/mphA/aac(3)-<br>IId/aadA5/dfrA17/sul1 | SH274 | Guangxi Province | 2016 |
| pSH275-2 | MG299139 | IncB/O/K/Z | 109845 | blaCTX-M-14/mphA/aac(3)-<br>IId/aadA5/dfrA17/sul1 | SH275 | Guangxi Province | 2016 |
| pSH276-2 | MG299141 | IncB/O/K/Z | 109845 | blaCTX-M-14/mphA/aac(3)-<br>IId/aadA5/dfrA17/sul1 | SH276 | Guangxi Province | 2016 |
| pSH278-2 | MG299143 | IncB/O/K/Z | 109845 | blaCTX-M-14/mphA/aac(3)-<br>IId/aadA5/dfrA17/sul1 | SH278 | Guangxi Province | 2016 |
| pSH280-2 | MG299145 | IncB/O/K/Z | 109845 | blaCTX-M-14/mphA/aac(3)-<br>IId/aadA5/dfrA17/sul1 | SH280 | Guangxi Province | 2016 |
| pSH284-2 | MG299147 | IncB/O/K/Z | 109845 | blaCTX-M-14/mphA/aac(3)-<br>IId/aadA5/dfrA17/sul1 | SH284 | Guangxi Province | 2016 |



|              |          |               |        |                                                   |           |                     |      |
|--------------|----------|---------------|--------|---------------------------------------------------|-----------|---------------------|------|
| pSH286-2     | MG299149 | IncB/O/K/Z    | 109845 | blaCTX-M-14/mphA/aac(3)-<br>IId/aadA5/dfrA17/sul1 | SH286     | Guangxi<br>Province | 2016 |
| pSH287-2     | MG299151 | IncB/O/K/Z    | 109845 | blaCTX-M-14/mphA/aac(3)-<br>IId/aadA5/dfrA17/sul1 | SH287     | Guangxi<br>Province | 2016 |
| pSH292-2     | MG299153 | IncB/O/K/Z    | 109845 | blaCTX-M-14/mphA/aac(3)-<br>IId/aadA5/dfrA17/sul1 | SH292     | Guangxi<br>Province | 2016 |
| pSH13D178-1  |          | IncB/O/K/Z    | 108915 | ermB/mphA/aadA5/dfrA17/sul1                       | SH13D178  | Shanghai City       | 2013 |
| pSH13D178-2  |          | IncFII        | 96612  | blaTEM-1/mphA/aac(3)-<br>IId/aadA5/dfrA17/sul1    | SH13D178  | Shanghai City       | 2013 |
| pSH13D178-3  |          | IncI1-(Alpha) | 81100  | blaCMY-2                                          | SH13D178  | Shanghai City       | 2013 |
| pSH11sh418-1 |          | IncI1-(Alpha) | 113793 | blaCTX-M-14/blaTEM-1/aac(3)-IId                   | SH11sh418 | Shanghai City       | 2011 |

**Table S5. The SNPs detected associated with *cef<sup>R</sup>azi<sup>R</sup>* isolates especially the outbreak strains(Chi-squared test, adjusted by FDR correction)**

| SNP position <sup>a</sup> | SNP | Mutation type      | gene      | start   | end     | product                                              | P value (Outbreak strains associated) <sup>b</sup> | P value ( <i>cef<sup>R</sup>azi<sup>R</sup></i> strains associated) <sup>b</sup> | COG     | Code | Gene in COG |
|---------------------------|-----|--------------------|-----------|---------|---------|------------------------------------------------------|----------------------------------------------------|----------------------------------------------------------------------------------|---------|------|-------------|
| 148125                    | C>T | Samesense mutation | gcd       | 147811  | 150201  | glucose dehydrogenase                                | 6.16E-84                                           | 3.92E-94                                                                         |         |      |             |
| 172616                    | G>A | Samesense mutation | pcnB      | 171926  | 173290  | poly(A) polymerase I                                 | 4.88E-77                                           | 2.20E-98                                                                         |         |      |             |
| 561422                    | C>T | Samesense mutation | ybdE      | 559031  | 562174  | putative inner membrane component for iron           | 2.61E-154                                          | 2.33E-136                                                                        |         |      |             |
| 720375                    | C>T | Samesense mutation | sucA      | 719395  | 722196  | 2-oxoglutarate dehydrogenase decarboxylase component | 1.06E-98                                           | 6.50E-81                                                                         |         |      |             |
| 824594                    | A>C | Samesense mutation | ybiB      | 824118  | 825080  | putative enzyme                                      | 2.02E-74                                           | 2.22E-94                                                                         |         |      |             |
| 844182                    | C>T | Samesense mutation | ybiR      | 843811  | 844929  | conserved hypothetical protein                       | 2.02E-74                                           | 2.22E-94                                                                         |         |      |             |
| 947726                    | T>C | Samesense mutation | ftsK      | 947043  | 951110  | cell division protein                                | 2.02E-74                                           | 2.22E-94                                                                         |         |      |             |
| 1207876                   | C>T | Samesense mutation | ndh       | 1207384 | 1208688 | respiratory NADH dehydrogenase                       | 8.09E-132                                          | 7.28E-151                                                                        |         |      |             |
| 1213343                   | C>T | Samesense mutation | mfd       | 1211828 | 1215274 | transcription-repair coupling factor                 | 2.02E-74                                           | 2.22E-94                                                                         |         |      |             |
| 2300159                   | A>G | Samesense mutation | yohF      | 2299442 | 2300203 | putative oxidoreductase                              | 7.40E-62                                           | 3.28E-75                                                                         |         |      |             |
| 2373264                   | A>G | Samesense mutation | napB      | 2372869 | 2373339 | cytochrome c-type protein                            | 7.40E-62                                           | 3.28E-75                                                                         |         |      |             |
| 2465186                   | C>A | Samesense mutation | nuoL      | 2464205 | 2466046 | NADH dehydrogenase I chain L                         | 2.61E-154                                          | 2.33E-136                                                                        |         |      |             |
| 2639389                   | A>G | Samesense mutation | zipA      | 2638840 | 2639826 | cell division protein                                | 2.02E-74                                           | 2.22E-94                                                                         |         |      |             |
| 2643003                   | A>G | Samesense mutation | ptsI      | 2642659 | 2644386 | PEP-protein phosphotransferase system enzyme I       | 7.40E-62                                           | 3.28E-75                                                                         |         |      |             |
| 2745444                   | G>A | Samesense mutation | yfgA      | 2745373 | 2746386 | putative membrane protein                            | 1.06E-98                                           | 6.50E-81                                                                         |         |      |             |
| 3055920                   | A>T | Samesense mutation | cysI      | 3054225 | 3055937 | sulfite reductase, alpha subunit                     | 7.40E-62                                           | 3.28E-75                                                                         |         |      |             |
| 3655517                   | G>A | Samesense mutation | yhfC      | 3654567 | 3655748 | putative transport                                   | 4.88E-77                                           | 2.20E-98                                                                         |         |      |             |
| 3821395                   | G>A | Samesense mutation | recF      | 3821059 | 3822132 | ssDNA and dsDNA binding protein                      | 4.88E-77                                           | 2.20E-98                                                                         |         |      |             |
| 3885819                   | G>A | Samesense mutation | zntA      | 3883720 | 3885918 | zinc-transporting ATPase                             | 4.88E-77                                           | 2.20E-98                                                                         |         |      |             |
| 4189282                   | G>A | Samesense mutation | yifM      | 4188215 | 4189294 | Uncharacterized conserved protein                    | 7.87E-64                                           |                                                                                  |         |      |             |
| 4226472                   | A>G | Samesense mutation | metR      | 4225953 | 4226906 | regulator for metE and methH                         | 7.40E-62                                           | 3.28E-75                                                                         |         |      |             |
| 4491950                   | T>C | Samesense mutation | tyrB      | 4491537 | 4492730 | tyrosine aminotransferase, tyrosine repressible      | 2.02E-74                                           | 2.22E-94                                                                         |         |      |             |
| 4624346                   | A>G | Samesense mutation | mutL      | 4624260 | 4626107 | enzyme in methyl-directed mismatch repair            | 8.22E-82                                           | 4.33E-91                                                                         |         |      |             |
| 4634057                   | C>T | Samesense mutation | vacB      | 4633461 | 4635944 | putative enzyme                                      | 4.88E-77                                           | 2.20E-98                                                                         |         |      |             |
| 3194910                   | G>A | Nonsense mutation  | SSON_3035 | 3193619 | 3196474 | putative dehydrogenase                               | 1.06E-98                                           | 6.50E-81                                                                         | COG1529 | C    | CoxL        |
| 148674                    | A>G | Missense mutation  | gcd       | 147811  | 150201  | glucose dehydrogenase                                |                                                    | 1.27E-53                                                                         | COG4993 | G    | Gcd         |
| 230238                    | T>C | Missense mutation  | yaeO      | 230038  | 230298  | conserved hypothetical protein                       | 2.02E-74                                           | 2.22E-94                                                                         | COG4568 | K    | Rof         |
| 300237                    | C>T | Missense mutation  | fliA      | 299468  | 301207  | flagellar biosynthesis                               | 4.88E-77                                           | 2.20E-98                                                                         | COG1298 | NU   | FliA        |
| 370713                    | C>T | Missense mutation  | tauB      | 370289  | 371056  | taurine ATP-binding component of a transport system  | 3.17E-100                                          | 6.50E-81                                                                         | COG4525 | P    | TauB        |
| 391136                    | C>T | Missense mutation  | aroM      | 390817  | 391494  | protein of aro operon, regulated by aroR             | 8.22E-82                                           | 4.33E-91                                                                         |         |      |             |
| 441036                    | A>G | Missense mutation  | ampG      | 440867  | 442342  | regulates beta-lactamase synthesis                   | 4.88E-77                                           | 2.20E-98                                                                         | COG0477 | GEPR | ProP        |
| 562166                    | C>T | Missense mutation  | ybdE      | 559031  | 562174  | putative inner membrane component for iron           | 1.73E-158                                          | 2.97E-141                                                                        | COG3696 | P    | CusA        |
| 667248                    | C>T | Missense mutation  | nagE      | 666825  | 668771  | PTS system, N-acetylglucosamine-specific enzyme      | 4.88E-77                                           | 2.20E-98                                                                         | COG1263 | G    | PtsG1       |
| 727336                    | T>C | Missense mutation  | hrsA      | 726492  | 728468  | protein modification enzyme, induction of ompC       | 7.40E-62                                           | 3.28E-75                                                                         | COG1299 | G    | FrwC        |
| 1201878                   | C>T | Missense mutation  | fhuE      | 1200653 | 1202842 | outer membrane receptor for ferric iron uptake       |                                                    | 1.27E-53                                                                         | COG4773 | P    | FhuE        |
| 1527239                   | C>T | Missense mutation  | SSON_1453 | 1526567 | 1528003 | conserved hypothetical protein                       | 2.02E-74                                           | 2.22E-94                                                                         |         |      |             |
| 1603227                   | C>A | Missense mutation  | ydgO      | 1603150 | 1604208 | conserved hypothetical protein                       | 3.17E-100                                          | 6.50E-81                                                                         | COG4658 | C    | RnfD        |
| 2056926                   | A>G | Missense mutation  | SSON_1954 | 2056895 | 2057113 | conserved hypothetical protein                       | 4.88E-77                                           | 2.20E-98                                                                         |         |      |             |
| 2169250                   | T>C | Missense mutation  | pduS      | 2168853 | 2169755 | putative propanediol utilization protein             | 8.09E-132                                          | 7.28E-151                                                                        | COG4656 | C    | RnfC        |
| 2287864                   | C>G | Missense mutation  | yehV      | 2287841 | 2288488 | putative transcriptional regulator                   | 8.09E-132                                          | 7.28E-151                                                                        | COG0789 | K    | SoxR        |
| 2411350                   | A>G | Missense mutation  | gyrA      | 2408970 | 2411597 | DNA gyrase subunit A                                 | 5.97E-52                                           | 3.56E-60                                                                         | COG0188 | L    | GyrA        |
| 2492128                   | T>A | Missense mutation  | yfcG      | 2491612 | 2492259 | putative S-transferase                               | 4.88E-77                                           | 2.20E-98                                                                         | COG0625 | O    | GstA        |
| 2524499                   | C>T | Missense mutation  | yfcU      | 2524198 | 2526840 | PapC-like porin protein                              | 4.88E-77                                           | 2.20E-98                                                                         | COG3188 | NU   | FimD        |
| 2704351                   | C>A | Missense mutation  | hyfB      | 2703871 | 2705889 | hydrogenase 4 membrane subunit                       | 2.02E-74                                           | 2.22E-94                                                                         | COG0651 | CP   | HyfB        |
| 3013077                   | T>G | Missense mutation  | hycA      | 3012841 | 3013302 | transcriptional repression of hyc and hyp            | 2.24E-78                                           | 1.47E-95                                                                         |         |      |             |
| 3032159                   | G>T | Missense mutation  | nlpD      | 3031258 | 3032397 | lipoprotein                                          | 6.16E-84                                           | 3.92E-94                                                                         | COG0739 | M    | NlpD        |
| 3083989                   | G>A | Missense mutation  | ygcA      | 3083426 | 3084727 | putative enzyme                                      | 2.24E-78                                           | 1.47E-95                                                                         | COG2265 | J    | TrmA        |
| 3317052                   | A>G | Missense mutation  | ygiRQ     | 3315254 | 3317473 | Fe-S oxidoreductase                                  | 2.02E-74                                           | 2.22E-94                                                                         | COG1032 | C    | YgiQ        |
| 3371683                   | G>C | Missense mutation  | yqjH      | 3371397 | 3372161 | conserved hypothetical protein                       | 6.16E-84                                           | 3.92E-94                                                                         | COG2375 | P    | ViuB        |
| 3938553                   | G>A | Missense mutation  | gltS      | 3938436 | 3939641 | glutamate transport                                  | 2.61E-154                                          | 2.33E-136                                                                        | COG0786 | E    | GltS        |
| 3952595                   | G>A | Missense mutation  | recG      | 3939810 | 3941891 | DNA helicase                                         | 2.24E-78                                           | 1.47E-95                                                                         | COG1200 | LK   | RecG        |
| 4237501                   | C>T | Missense mutation  | yigP      | 4237068 | 4237673 | conserved hypothetical protein                       | 7.40E-62                                           | 3.28E-75                                                                         |         |      |             |
| 4366788                   | T>A | Missense mutation  | frwD      | 4366778 | 4367119 | PTS system fructose-like IIB component 2             | 8.09E-132                                          | 7.28E-151                                                                        | COG1445 | G    | FrwB        |
| 4438780                   | A>G | Missense mutation  | iclR      | 4438274 | 4439137 | repressor of accBA operon                            | 2.02E-74                                           | 2.22E-94                                                                         | COG1414 | K    | IclR        |
| 4620189                   | T>G | Missense mutation  | yjeS      | 4619776 | 4620915 | conserved hypothetical protein                       | 2.61E-154                                          | 2.33E-136                                                                        | COG1600 | C    | QueG        |
| 4655680                   | C>T | Missense mutation  | ytfB      | 4655096 | 4655770 | conserved hypothetical protein                       | 2.61E-154                                          | 2.33E-136                                                                        | COG3061 | M    | OapA        |
| 4666728                   | G>A | Missense mutation  | ytfK      | 4666555 | 4666800 | conserved hypothetical protein                       | 2.24E-78                                           | 1.47E-95                                                                         |         |      |             |
| 819559                    | T>C | Intergenic region  |           |         |         |                                                      | 2.02E-74                                           | 2.22E-94                                                                         |         |      |             |
| 1959401                   | G>A | Intergenic region  |           |         |         |                                                      | 4.88E-77                                           | 2.20E-98                                                                         |         |      |             |
| 3018039                   | T>G | Intergenic region  |           |         |         |                                                      | 2.02E-74                                           | 2.22E-94                                                                         |         |      |             |
| 3851577                   | A>G | Intergenic region  |           |         |         |                                                      | 4.88E-77                                           | 2.20E-98                                                                         |         |      |             |

<sup>a</sup>SNPs were detected by mapping to the reference genome *S. sonnei* Ss046 (accession NC\_007384); <sup>b</sup>One-sided chi-square tests were performed and P values were adjusted with FDR correction.

**Table S6. The SNPs associated with virulence-encoding genes**

| Chrom    | Position | Ref | Alt | NT_pos    | AA_pos    | Effect                                    | Gene |
|----------|----------|-----|-----|-----------|-----------|-------------------------------------------|------|
| CP000038 | 588479   | C   | T   | 398/747   | 133/248   | missense variant c.398C>T p.Ala133Val     | entA |
| CP000038 | 585275   | C   | T   | 860/1176  | 287/391   | missense variant c.860C>T p.Ser287Leu     | entC |
| CP000038 | 569125   | C   | T   | 409/630   | 137/209   | missense variant c.409G>A p.Ala137Thr     | entD |
| CP000038 | 569030   | A   | T   | 504/630   | 168/209   | synonymous variant c.504T>A p.Gly168Gly   | entD |
| CP000038 | 586449   | T   | C   | 849/1611  | 283/536   | synonymous variant c.849T>C p.Val283Val   | entE |
| CP000038 | 573908   | G   | A   | 307/3882  | 103/1293  | missense variant c.307G>A p.Ala103Thr     | entF |
| CP000038 | 576620   | C   | T   | 3019/3882 | 1007/1293 | synonymous variant c.3019C>T p.Leu1007Leu | entF |
| CP000038 | 576121   | C   | T   | 2520/3882 | 840/1293  | synonymous variant c.2520C>T p.Asp840Asp  | entF |
| CP000038 | 575328   | G   | A   | 1727/3882 | 576/1293  | missense variant c.1727G>A p.Cys576Tyr    | entF |
| CP000038 | 576954   | C   | T   | 3353/3882 | 1118/1293 | missense variant c.3353C>T p.Ala1118Val   | entF |
| CP000038 | 573843   | A   | C   | 242/3882  | 81/1293   | missense variant c.242A>C p.Gln81Pro      | entF |
| CP000038 | 577429   | T   | A   | 3828/3882 | 1276/1293 | synonymous variant c.3828T>A p.Ser1276Ser | entF |
| CP000038 | 577032   | C   | T   | 3431/3882 | 1144/1293 | missense variant c.3431C>T p.Ala1144Val   | entF |
| CP000038 | 576900   | C   | T   | 3299/3882 | 1100/1293 | missense variant c.3299C>T p.Pro1100Leu   | entF |
| CP000038 | 574693   | G   | A   | 1092/3882 | 364/1293  | synonymous variant c.1092G>A p.Gln364Gln  | entF |
| CP000038 | 571467   | C   | T   | 473/2241  | 158/746   | missense variant c.473G>A p.Gly158Asp     | fepA |
| CP000038 | 571232   | G   | T   | 708/2241  | 236/746   | synonymous variant c.708C>A p.Ala236Ala   | fepA |
| CP000038 | 569890   | T   | C   | 2050/2241 | 684/746   | missense variant c.2050A>G p.Thr684Ala    | fepA |
| CP000038 | 569981   | C   | T   | 1959/2241 | 653/746   | synonymous variant c.1959G>A p.Gln653Gln  | fepA |
| CP000038 | 569919   | C   | T   | 2021/2241 | 674/746   | missense variant c.2021G>A p.Ser674Asn    | fepA |
| CP000038 | 583136   | C   | T   | 906/966   | 302/321   | synonymous variant c.906G>A p.Leu302Leu   | fepB |
| CP000038 | 583475   | T   | G   | 567/966   | 189/321   | missense variant c.567A>C p.Leu189Phe     | fepB |
| CP000038 | 583325   | C   | T   | 717/966   | 239/321   | synonymous variant c.717G>A p.Gln239Gln   | fepB |
| CP000038 | 583315   | G   | A   | 727/966   | 243/321   | missense variant c.727C>T p.His243Tyr     | fepB |
| CP000038 | 579258   | C   | T   | 387/816   | 129/271   | synonymous variant c.387G>A p.Gln129Gln   | fepC |
| CP000038 | 579407   | C   | A   | 238/816   | 80/271    | missense variant c.238G>T p.Ala80Ser      | fepC |
| CP000038 | 579054   | C   | T   | 591/816   | 197/271   | synonymous variant c.591G>A p.Leu197Leu   | fepC |
| CP000038 | 579600   | C   | T   | 45/816    | 15/271    | synonymous variant c.45G>A p.Leu15Leu     | fepC |

|          |         |   |   |          |         |                                         |        |
|----------|---------|---|---|----------|---------|-----------------------------------------|--------|
| CP000038 | 578978  | C | T | 667/816  | 223/271 | missense variant c.667G>A p.Val223Ile   | fepC   |
| CP000038 | 581008  | A | G | 627/1005 | 209/334 | synonymous variant c.627T>C p.Thr209Thr | fepD   |
| CP000038 | 581014  | T | C | 621/1005 | 207/334 | synonymous variant c.621A>G p.Gly207Gly | fepD   |
| CP000038 | 581460  | C | T | 175/1005 | 59/334  | missense variant c.175G>A p.Ala59Thr    | fepD   |
| CP000038 | 580675  | C | T | 960/1005 | 320/334 | synonymous variant c.960G>A p.Pro320Pro | fepD   |
| CP000038 | 578686  | C | G | 988/1134 | 330/377 | missense variant c.988C>G p.Pro330Ala   | fepE   |
| CP000038 | 578264  | G | T | 566/1134 | 189/377 | missense variant c.566G>T p.Ser189Ile   | fepE   |
| CP000038 | 577867  | A | C | 169/1134 | 57/377  | missense variant c.169A>C p.Ile57Leu    | fepE   |
| CP000038 | 578295  | G | A | 597/1134 | 199/377 | synonymous variant c.597G>A p.Val199Val | fepE   |
| CP000038 | 578291  | T | C | 593/1134 | 198/377 | missense variant c.593T>C p.Leu198Ser   | fepE   |
| CP000038 | 580249  | T | G | 385/993  | 129/330 | missense variant c.385A>C p.Thr129Pro   | fepG   |
| CP000038 | 580067  | C | T | 567/993  | 189/330 | synonymous variant c.567G>A p.Thr189Thr | fepG   |
| CP000038 | 795527  | A | G | 411/1764 | 137/587 | synonymous variant c.411T>C p.Cys137Cys | ipaH 1 |
| CP000038 | 795504  | A | T | 434/1764 | 145/587 | stop gained c.434T>A p.Leu145*          | ipaH 1 |
| CP000038 | 795451  | G | C | 487/1764 | 163/587 | missense variant c.487C>G p.Pro163Ala   | ipaH 1 |
| CP000038 | 795312  | T | C | 626/1764 | 209/587 | missense variant c.626A>G p.Asn209Ser   | ipaH 1 |
| CP000038 | 795528  | C | T | 410/1764 | 137/587 | missense variant c.410G>A p.Cys137Tyr   | ipaH 1 |
| CP000038 | 795149  | C | A | 789/1764 | 263/587 | synonymous variant c.789G>T p.Leu263Leu | ipaH 1 |
| CP000038 | 795843  | T | C | 95/1764  | 32/587  | missense variant c.95A>G p.Tyr32Cys     | ipaH 1 |
| CP000038 | 1347573 | T | C | 239/1752 | 80/583  | missense variant c.239A>G p.Glu80Gly    | ipaH 2 |
| CP000038 | 1347228 | G | T | 584/1752 | 195/583 | missense variant c.584C>A p.Pro195His   | ipaH 2 |
| CP000038 | 1391329 | A | C | 520/1716 | 174/571 | missense variant c.520T>G p.Phe174Val   | ipaH 3 |
| CP000038 | 1391809 | A | G | 40/1716  | 14/571  | missense variant c.40T>C p.Ser14Pro     | ipaH 3 |
| CP000038 | 1391264 | T | G | 585/1716 | 195/571 | synonymous variant c.585A>C p.Leu195Leu | ipaH 3 |
| CP000038 | 1391845 | A | C | 4/1716   | 2/571   | missense variant c.4T>G p.Ser2Ala       | ipaH 3 |
| CP000038 | 1391234 | T | A | 615/1716 | 205/571 | synonymous variant c.615A>T p.Ser205Ser | ipaH 3 |
| CP000038 | 1391716 | T | C | 133/1716 | 45/571  | missense variant c.133A>G p.Asn45Asp    | ipaH 3 |
| CP000038 | 2282495 | A | G | 36/1644  | 12/547  | synonymous variant c.36A>G p.Gly12Gly   | ipaH 4 |
| CP000038 | 2805291 | C | T | 324/1827 | 108/608 | synonymous variant c.324C>T p.Phe108Phe | ipaH 5 |
| CP000038 | 2805603 | A | G | 636/1827 | 212/608 | synonymous variant c.636A>G p.Leu212Leu | ipaH 5 |

|          |         |   |   |           |          |                                          |        |
|----------|---------|---|---|-----------|----------|------------------------------------------|--------|
| CP000038 | 2805552 | A | G | 585/1827  | 195/608  | synonymous variant c.585A>G p.Leu195Leu  | ipaH 5 |
| CP000038 | 2805339 | G | A | 372/1827  | 124/608  | synonymous variant c.372G>A p.Val124Val  | ipaH 5 |
| CP000038 | 2805281 | G | A | 314/1827  | 105/608  | missense variant c.314G>A p.Arg105Lys    | ipaH 5 |
| CP000038 | 2805347 | A | C | 380/1827  | 127/608  | missense variant c.380A>C p.Asn127Thr    | ipaH 5 |
| CP000038 | 2805089 | A | C | 122/1827  | 41/608   | missense variant c.122A>C p.Glu41Ala     | ipaH 5 |
| CP000038 | 2805445 | A | G | 478/1827  | 160/608  | missense variant c.478A>G p.Lys160Glu    | ipaH 5 |
| CP000038 | 2805966 | T | A | 999/1827  | 333/608  | synonymous variant c.999T>A p.Val333Val  | ipaH 5 |
| CP000038 | 3767718 | C | T | 169/1725  | 57/574   | missense variant c.169C>T p.Pro57Ser     | iucA   |
| CP000038 | 3770057 | C | T | 783/948   | 261/315  | synonymous variant c.783C>T p.Pro261Pro  | iucB   |
| CP000038 | 3769348 | G | T | 74/948    | 25/315   | missense variant c.74G>T p.Gly25Val      | iucB   |
| CP000038 | 3771388 | C | T | 1167/1743 | 389/580  | synonymous variant c.1167C>T p.Ser389Ser | iucC   |
| CP000038 | 3771250 | C | T | 1029/1743 | 343/580  | synonymous variant c.1029C>T p.Tyr343Tyr | iucC   |
| CP000038 | 3771821 | T | C | 1600/1743 | 534/580  | missense variant c.1600T>C p.Phe534Leu   | iucC   |
| CP000038 | 3772125 | C | T | 165/1338  | 55/445   | synonymous variant c.165C>T p.Thr55Thr   | iucD   |
| CP000038 | 3772596 | C | T | 636/1338  | 212/445  | synonymous variant c.636C>T p.Asn212Asn  | iucD   |
| CP000038 | 3775075 | A | T | 1775/2199 | 592/732  | missense variant c.1775A>T p.Tyr592Phe   | iutA   |
| CP000038 | 3775436 | T | C | 2136/2199 | 712/732  | synonymous variant c.2136T>C p.Ala712Ala | iutA   |
| CP000038 | 3774298 | A | C | 998/2199  | 333/732  | missense variant c.998A>C p.Gln333Pro    | iutA   |
| CP000038 | 1360466 | C | T | 244/972   | 82/323   | missense variant c.244C>T p.Arg82Cys     | msbB   |
| CP000038 | 695340  | C | T | 1097/3387 | 366/1128 | missense variant c.1097C>T p.Thr366Met   | rhsA   |
| CP000038 | 695275  | T | C | 1032/3387 | 344/1128 | synonymous variant c.1032T>C p.Ser344Ser | rhsA   |
| CP000038 | 697013  | C | T | 2770/3387 | 924/1128 | missense variant c.2770C>T p.His924Tyr   | rhsA   |
| CP000038 | 697213  | G | A | 2970/3387 | 990/1128 | synonymous variant c.2970G>A p.Arg990Arg | rhsA   |
| CP000038 | 4005390 | G | A | 2435/2949 | 812/982  | missense variant c.2435C>T p.Pro812Leu   | rhsB   |
| CP000038 | 4005407 | T | C | 2418/2949 | 806/982  | synonymous variant c.2418A>G p.Arg806Arg | rhsB   |
| CP000038 | 4005647 | C | T | 2178/2949 | 726/982  | synonymous variant c.2178G>A p.Val726Val | rhsB   |
| CP000038 | 4005017 | T | A | 2808/2949 | 936/982  | missense variant c.2808A>T p.Gln936His   | rhsB   |
| CP000038 | 4005414 | T | A | 2411/2949 | 804/982  | missense variant c.2411A>T p.Gln804Leu   | rhsB   |
| CP000038 | 4005067 | C | T | 2758/2949 | 920/982  | missense variant c.2758G>A p.Val920Ile   | rhsB   |
| CP000038 | 4007773 | C | T | 52/2949   | 18/982   | missense variant c.52G>A p.Val18Met      | rhsB   |

|          |         |   |   |           |           |                                          |      |
|----------|---------|---|---|-----------|-----------|------------------------------------------|------|
| CP000038 | 4005133 | C | A | 2692/2949 | 898/982   | missense variant c.2692G>T p.Gly898Trp   | rhsB |
| CP000038 | 4005139 | G | T | 2686/2949 | 896/982   | missense variant c.2686C>A p.Pro896Thr   | rhsB |
| CP000038 | 4005173 | A | C | 2652/2949 | 884/982   | synonymous variant c.2652T>G p.Pro884Pro | rhsB |
| CP000038 | 2824864 | C | T | 726/1176  | 242/391   | synonymous variant c.726C>T p.Thr242Thr  | senB |
| CP000038 | 2824653 | G | A | 515/1176  | 172/391   | missense variant c.515G>A p.Ser172Asn    | senB |
| CP000038 | 2824603 | T | G | 465/1176  | 155/391   | missense variant c.465T>G p.Phe155Leu    | senB |
| CP000038 | 2824791 | C | A | 653/1176  | 218/391   | missense variant c.653C>A p.Thr218Lys    | senB |
| CP000038 | 2824287 | T | G | 149/1176  | 50/391    | missense variant c.149T>G p.Val50Gly     | senB |
| CP000038 | 2824720 | G | A | 582/1176  | 194/391   | synonymous variant c.582G>A p.Thr194Thr  | senB |
| CP000038 | 2824514 | T | C | 376/1176  | 126/391   | missense variant c.376T>C p.Phe126Leu    | senB |
| CP000038 | 2825290 | G | A | 1152/1176 | 384/391   | synonymous variant c.1152G>A p.Leu384Leu | senB |
| CP000038 | 3392326 | G | A | 1493/3858 | 498/1285  | missense variant c.1493C>T p.Thr498Ile   | sigA |
| CP000038 | 3391158 | A | G | 2661/3858 | 887/1285  | synonymous variant c.2661T>C p.Thr887Thr | sigA |
| CP000038 | 3390404 | C | T | 3415/3858 | 1139/1285 | missense variant c.3415G>A p.Glu1139Lys  | sigA |
| CP000038 | 3390775 | C | T | 3044/3858 | 1015/1285 | missense variant c.3044G>A p.Gly1015Glu  | sigA |
| CP000038 | 3390506 | C | T | 3313/3858 | 1105/1285 | missense variant c.3313G>A p.Asp1105Asn  | sigA |
| CP000038 | 3390090 | A | C | 3729/3858 | 1243/1285 | missense variant c.3729T>G p.Ile1243Met  | sigA |
| CP000038 | 3392008 | A | G | 1811/3858 | 604/1285  | missense variant c.1811T>C p.Ile604Thr   | sigA |
| CP000038 | 3390667 | C | T | 3152/3858 | 1051/1285 | missense variant c.3152G>A p.Gly1051Asp  | sigA |
| CP000038 | 3390734 | G | A | 3085/3858 | 1029/1285 | missense variant c.3085C>T p.Arg1029Cys  | sigA |
| CP000038 | 3390781 | C | G | 3038/3858 | 1013/1285 | missense variant c.3038G>C p.Arg1013Pro  | sigA |
| CP000038 | 3392922 | A | C | 897/3858  | 299/1285  | missense variant c.897T>G p.Asn299Lys    | sigA |
| CP000038 | 3391874 | C | A | 1945/3858 | 649/1285  | missense variant c.1945G>T p.Val649Phe   | sigA |
| CP000038 | 3391963 | A | T | 1856/3858 | 619/1285  | missense variant c.1856T>A p.Phe619Tyr   | sigA |
| CP000038 | 3390775 | C | A | 3044/3858 | 1015/1285 | missense variant c.3044G>T p.Gly1015Val  | sigA |
| CP000038 | 3392033 | T | G | 1786/3858 | 596/1285  | missense variant c.1786A>C p.Thr596Pro   | sigA |
| CP000038 | 1857399 | C | T | 152/915   | 51/304    | missense variant c.152C>T p.Ala51Val     | sitA |
| CP000038 | 1857251 | C | T | 4/915     | 2/304     | missense variant c.4C>T p.His2Tyr        | sitA |
| CP000038 | 1857319 | A | G | 72/915    | 24/304    | synonymous variant c.72A>G p.Ala24Ala    | sitA |
| CP000038 | 1857367 | G | A | 120/915   | 40/304    | synonymous variant c.120G>A p.Ala40Ala   | sitA |

|          |         |   |   |         |         |                                         |      |
|----------|---------|---|---|---------|---------|-----------------------------------------|------|
| CP000038 | 1857424 | T | C | 177/915 | 59/304  | synonymous variant c.177T>C p.Pro59Pro  | sitA |
| CP000038 | 1857547 | C | T | 300/915 | 100/304 | synonymous variant c.300C>T p.Leu100Leu | sitA |
| CP000038 | 1857601 | C | T | 354/915 | 118/304 | synonymous variant c.354C>T p.Thr118Thr | sitA |
| CP000038 | 1857607 | A | C | 360/915 | 120/304 | synonymous variant c.360A>C p.Gly120Gly | sitA |
| CP000038 | 1857628 | T | C | 381/915 | 127/304 | synonymous variant c.381T>C p.Asn127Asn | sitA |
| CP000038 | 1857637 | A | C | 390/915 | 130/304 | synonymous variant c.390A>C p.Ala130Ala | sitA |
| CP000038 | 1858030 | A | G | 783/915 | 261/304 | synonymous variant c.783A>G p.Ala261Ala | sitA |
| CP000038 | 1858045 | G | A | 798/915 | 266/304 | synonymous variant c.798G>A p.Val266Val | sitA |
| CP000038 | 1858105 | T | G | 858/915 | 286/304 | synonymous variant c.858T>G p.Leu286Leu | sitA |
| CP000038 | 1857811 | G | A | 564/915 | 188/304 | synonymous variant c.564G>A p.Gln188Gln | sitA |
| CP000038 | 1858003 | G | A | 756/915 | 252/304 | synonymous variant c.756G>A p.Ala252Ala | sitA |
| CP000038 | 1858176 | A | G | 15/828  | 5/275   | synonymous variant c.15A>G p.Ala5Ala    | sitB |
| CP000038 | 1858449 | G | A | 288/828 | 96/275  | synonymous variant c.288G>A p.Leu96Leu  | sitB |
| CP000038 | 1858485 | T | C | 324/828 | 108/275 | synonymous variant c.324T>C p.His108His | sitB |
| CP000038 | 1858575 | T | A | 414/828 | 138/275 | synonymous variant c.414T>A p.Arg138Arg | sitB |
| CP000038 | 1858740 | A | G | 579/828 | 193/275 | synonymous variant c.579A>G p.Lys193Lys | sitB |
| CP000038 | 1858907 | A | G | 746/828 | 249/275 | missense variant c.746A>G p.Asp249Gly   | sitB |
| CP000038 | 1858940 | G | A | 779/828 | 260/275 | missense variant c.779G>A p.Arg260His   | sitB |
| CP000038 | 1858334 | G | A | 173/828 | 58/275  | missense variant c.173G>A p.Arg58His    | sitB |
| CP000038 | 1859048 | A | G | 63/858  | 21/285  | synonymous variant c.63A>G p.Ala21Ala   | sitC |
| CP000038 | 1859243 | C | T | 258/858 | 86/285  | synonymous variant c.258C>T p.Thr86Thr  | sitC |
| CP000038 | 1859282 | G | C | 297/858 | 99/285  | synonymous variant c.297G>C p.Ser99Ser  | sitC |
| CP000038 | 1859495 | A | G | 510/858 | 170/285 | synonymous variant c.510A>G p.Leu170Leu | sitC |
| CP000038 | 1859537 | G | A | 552/858 | 184/285 | synonymous variant c.552G>A p.Ser184Ser | sitC |
| CP000038 | 1859651 | A | G | 666/858 | 222/285 | missense variant c.666A>G p.Ile222Met   | sitC |
| CP000038 | 1859792 | A | G | 807/858 | 269/285 | synonymous variant c.807A>G p.Gly269Gly | sitC |
| CP000038 | 1859881 | G | A | 42/858  | 14/285  | missense variant c.42G>A p.Met14Ile     | sitD |
| CP000038 | 1860291 | C | T | 452/858 | 151/285 | missense variant c.452C>T p.Ala151Val   | sitD |
| CP000038 | 1859874 | C | T | 35/858  | 12/285  | missense variant c.35C>T p.Thr12Ile     | sitD |
| CP000038 | 1860011 | A | G | 172/858 | 58/285  | missense variant c.172A>G p.Thr58Ala    | sitD |

|          |         |   |   |           |         |                                          |      |
|----------|---------|---|---|-----------|---------|------------------------------------------|------|
| CP000038 | 1860023 | G | A | 184/858   | 62/285  | missense variant c.184G>A p.Gly62Arg     | sitD |
| CP000038 | 1860121 | T | G | 282/858   | 94/285  | synonymous variant c.282T>G p.Val94Val   | sitD |
| CP000038 | 1860176 | A | G | 337/858   | 113/285 | missense variant c.337A>G p.Ile113Val    | sitD |
| CP000038 | 1860227 | A | G | 388/858   | 130/285 | missense variant c.388A>G p.Ile130Val    | sitD |
| CP000038 | 1860364 | G | T | 525/858   | 175/285 | missense variant c.525G>T p.Trp175Cys    | sitD |
| CP000038 | 1860421 | A | G | 582/858   | 194/285 | synonymous variant c.582A>G p.Ala194Ala  | sitD |
| CP000038 | 1860439 | T | C | 600/858   | 200/285 | synonymous variant c.600T>C p.Ser200Ser  | sitD |
| CP000038 | 1860472 | A | G | 633/858   | 211/285 | synonymous variant c.633A>G p.Ala211Ala  | sitD |
| CP000038 | 1860516 | C | T | 677/858   | 226/285 | missense variant c.677C>T p.Thr226Ile    | sitD |
| CP000038 | 1860554 | C | T | 715/858   | 239/285 | synonymous variant c.715C>T p.Leu239Leu  | sitD |
| CP000038 | 1860574 | C | T | 735/858   | 245/285 | synonymous variant c.735C>T p.Ser245Ser  | sitD |
| CP000038 | 1860610 | C | T | 771/858   | 257/285 | synonymous variant c.771C>T p.Val257Val  | sitD |
| CP000038 | 1860628 | T | C | 789/858   | 263/285 | synonymous variant c.789T>C p.Phe263Phe  | sitD |
| CP000038 | 1860665 | G | A | 826/858   | 276/285 | missense variant c.826G>A p.Ala276Thr    | sitD |
| CP000038 | 280299  | T | C | 1490/2142 | 497/713 | missense variant c.1490T>C p.Val497Ala   | vgrG |
| CP000038 | 280455  | T | A | 1646/2142 | 549/713 | missense variant c.1646T>A p.Leu549Gln   | vgrG |
| CP000038 | 280453  | C | T | 1644/2142 | 548/713 | synonymous variant c.1644C>T p.Asn548Asn | vgrG |
| CP000038 | 278875  | C | T | 66/2142   | 22/713  | synonymous variant c.66C>T p.Val22Val    | vgrG |
| CP000038 | 278885  | C | T | 76/2142   | 26/713  | synonymous variant c.76C>T p.Leu26Leu    | vgrG |
| CP000038 | 278833  | G | A | 24/2142   | 8/713   | synonymous variant c.24G>A p.Thr8Thr     | vgrG |
| CP000038 | 279887  | C | A | 1078/2142 | 360/713 | missense variant c.1078C>A p.Leu360Met   | vgrG |
| CP000038 | 278920  | G | T | 111/2142  | 37/713  | missense variant c.111G>T p.Glu37Asp     | vgrG |
| CP000038 | 279688  | T | G | 879/2142  | 293/713 | synonymous variant c.879T>G p.Ser293Ser  | vgrG |
| CP000038 | 280129  | G | A | 1320/2142 | 440/713 | synonymous variant c.1320G>A p.Pro440Pro | vgrG |
| CP000038 | 280622  | A | C | 1813/2142 | 605/713 | missense variant c.1813A>C p.Lys605Gln   | vgrG |





|            |     |    |    |     |             |             |            |          |   |   |                      |   |
|------------|-----|----|----|-----|-------------|-------------|------------|----------|---|---|----------------------|---|
| group 5215 | 187 | 43 | 28 | 204 | 0.869767442 | 0.174089069 | 219.750813 | 1.03E-49 | - | - | hypothetical protein | - |
| group 4039 | 186 | 45 | 29 | 202 | 0.865116279 | 0.182186235 | 211.717014 | 5.8E-48  | - | - | hypothetical protein | - |
| group 6698 | 186 | 45 | 29 | 202 | 0.865116279 | 0.182186235 | 211.717014 | 5.8E-48  | - | - | hypothetical protein | - |
| klcA       | 182 | 47 | 33 | 200 | 0.846511628 | 0.190283401 | 195.397547 | 2.11E-44 | - | - | hypothetical protein | - |

<sup>a</sup>One-sided chi-square tests were performed.

**Table S8. The primers used in this study**

| Target                                   | Primer sequence (5' to 3')                         | Amplicon size (bp) | Reference                 |
|------------------------------------------|----------------------------------------------------|--------------------|---------------------------|
| <i>bla</i> <sub>CTX-M-1</sub> group      | F: GGTTAAAAAATCACTGCGTC<br>R: TTACAAACCGTCGGTGACGA | 873                | Matar et al. <sup>1</sup> |
| <i>bla</i> <sub>CTX-M-9</sub> group      | F: AGAGTGCAACGGATGATG<br>R: CCAGTTACAGCCCTTCGG     | 868                | Matar et al. <sup>1</sup> |
| <i>bla</i> <sub>CTX-M-2/8/25</sub> group | F: ACCGAGCCSACGCTCAA<br>R: CCGCTGCCGGTTTTATC       | 221                | This study                |
| <i>bla</i> <sub>CTX-M-14</sub>           | F: AGCCTGCCGATCTGGTTAA<br>R: CCGGTCGTATTGCCTTTG    | 358                | Ma et al. <sup>2</sup>    |
| <i>mphA</i>                              | F: CGAAGACCTCCGAGTCCTGC<br>R: CCGCCGATACCTCCCAACT  | 354                | Ma et al. <sup>2</sup>    |
| <i>mcr-1</i>                             | F: CGGTCAGTCCGTTTGTTTC<br>R: CTTGGTCGGTCTGTAGGG    | 309                | Liu et al. <sup>3</sup>   |

**Supplementary References**

- 1 Matar, G. M. *et al.* First detection and sequence analysis of the bla-CTX-M-15 gene in Lebanese isolates of extended-spectrum-beta-lactamase-producing *Shigella sonnei*. *Ann Trop Med Parasitol* **101**, 511-517, doi:10.1179/136485907X193860 (2007).
- 2 Ma, Q. *et al.* A Waterborne Outbreak of *Shigella sonnei* with Resistance to Azithromycin and Third-Generation Cephalosporins in China in 2015. *Antimicrob Agents Chemother* **61**, doi:10.1128/AAC.00308-17 (2017).
- 3 Liu, Y. Y. *et al.* Emergence of plasmid-mediated colistin resistance mechanism MCR-1 in animals and human beings in China: a microbiological and molecular biological study. *Lancet Infect Dis* **16**, 161-168, doi:10.1016/S1473-3099(15)00424-7 (2015).

# Uncropped images of Figure S1

**a**

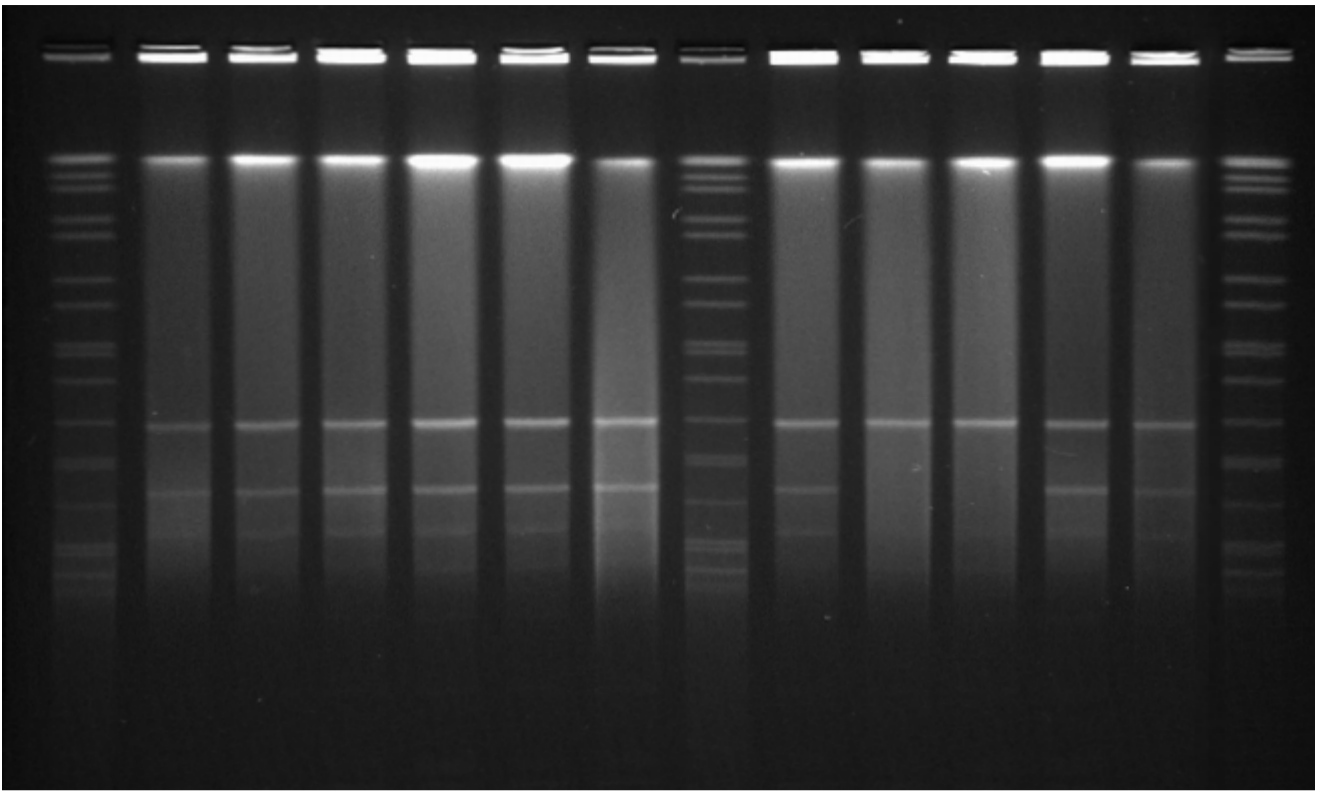

**b**

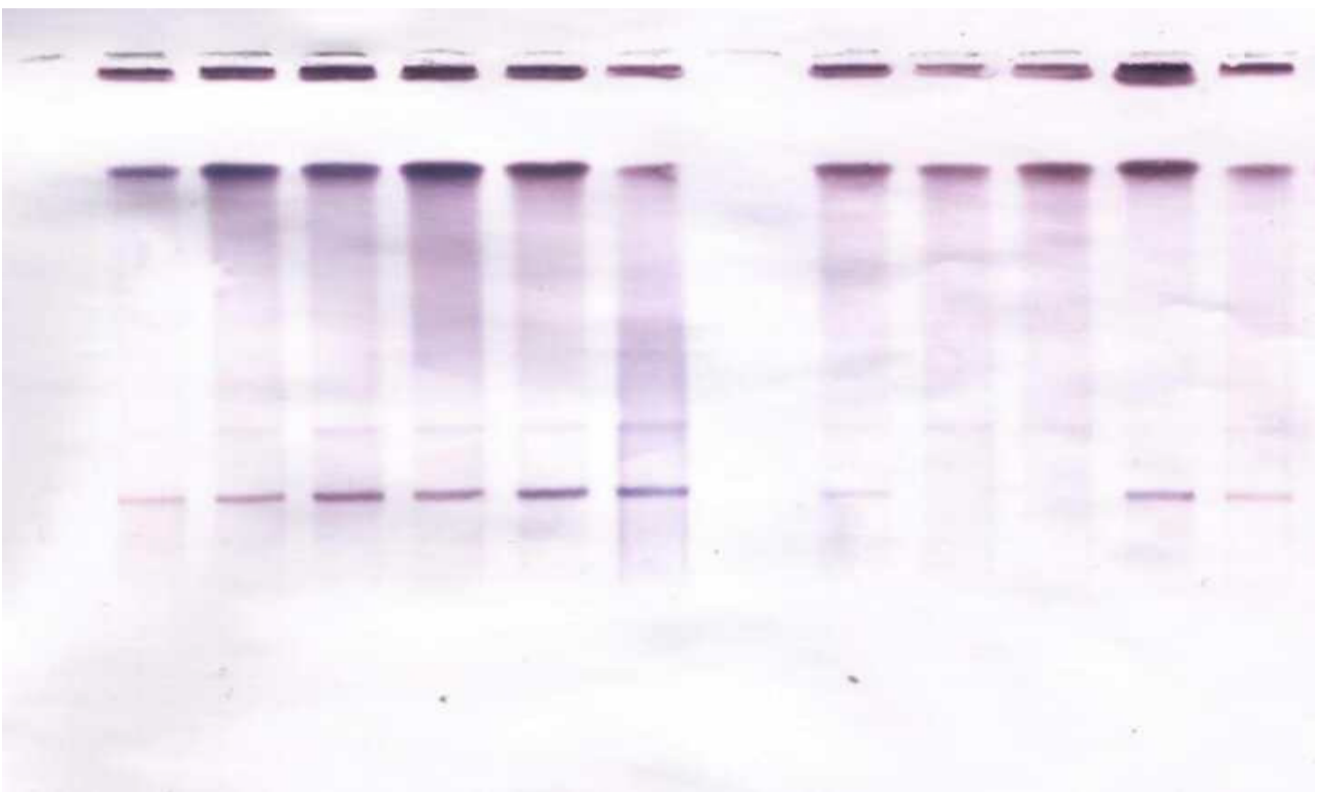

**c**

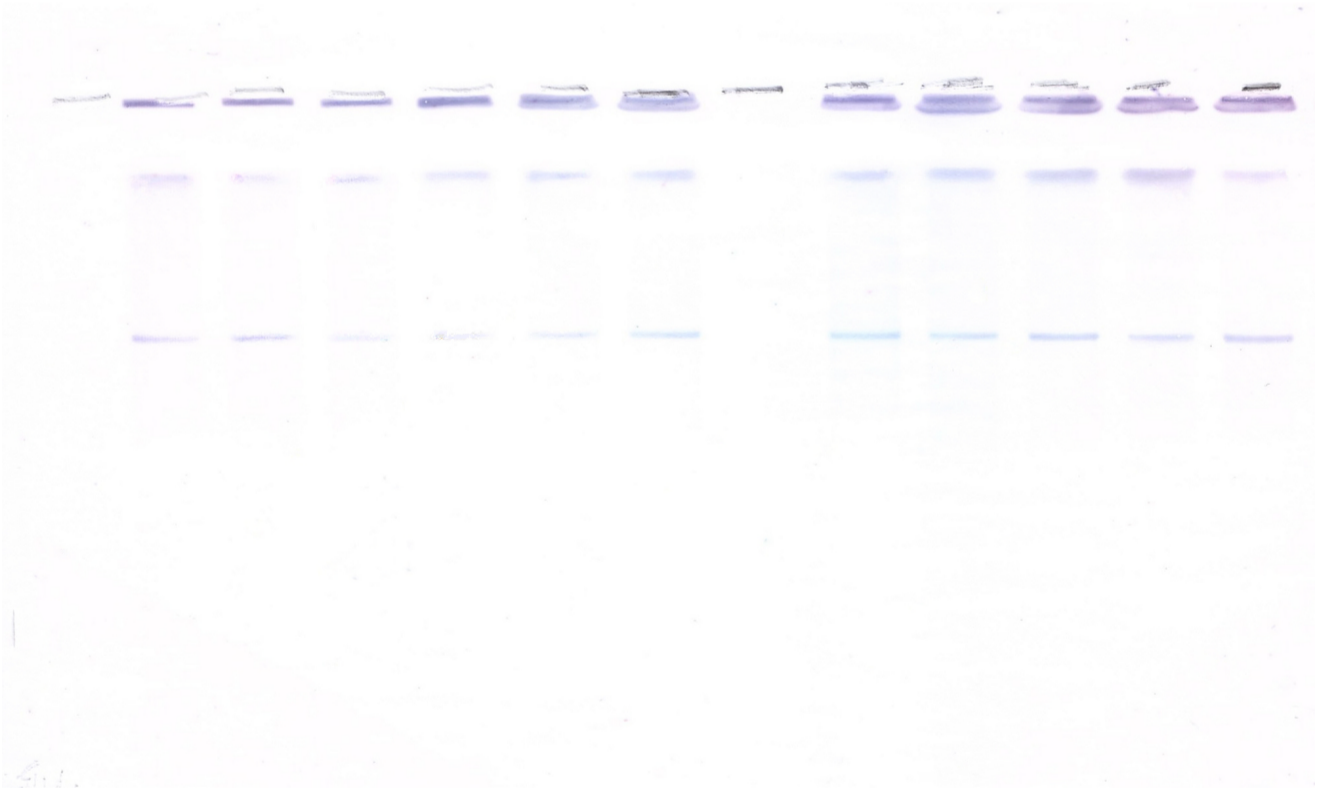

**d**

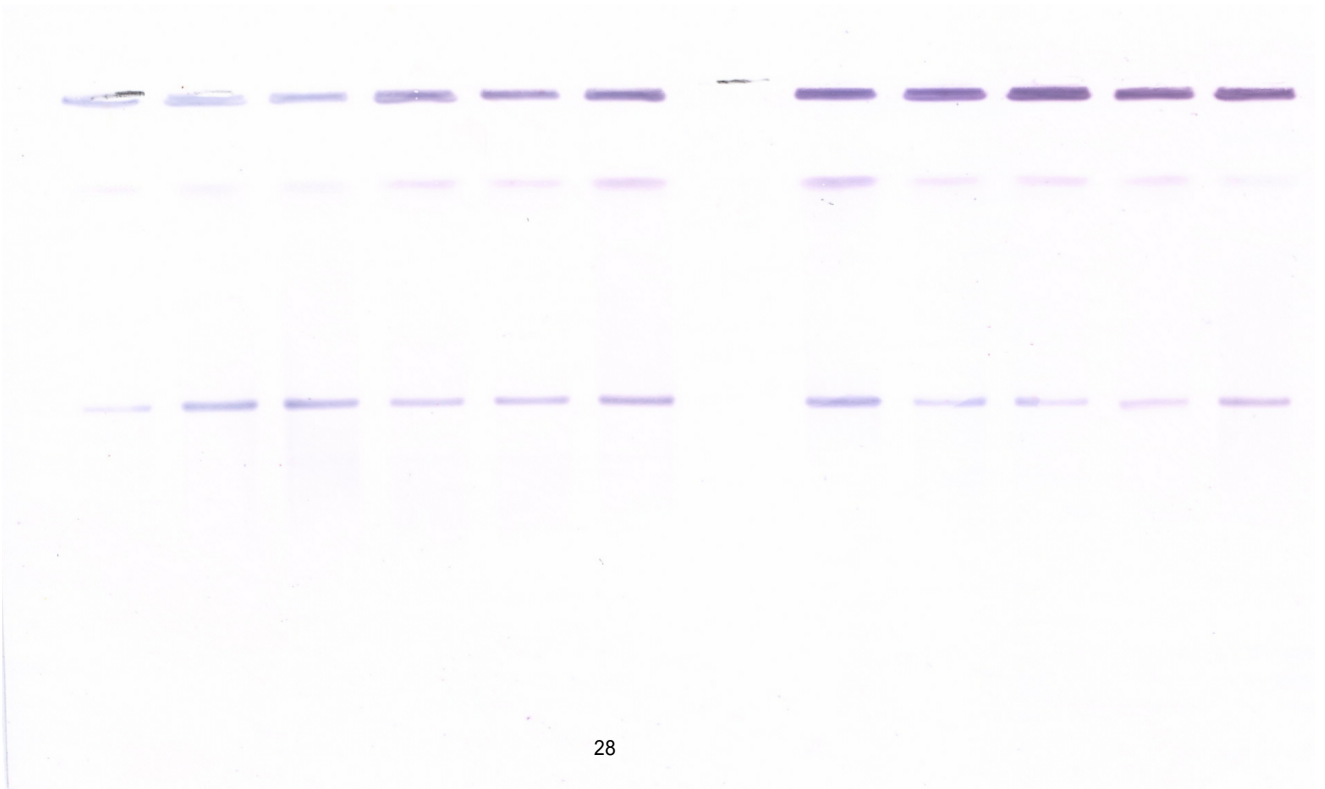

Supplement: 41467_2022_35136_MOESM1_ESM.pdf [file 41467_2022_35136_MOESM1_ESM.pdf]
